# Supplementary material for: Essential role of Salmonella Enteritidis DNA adenine methylase in modulating inflammasome activation
Source: PubMed Central journal article supplement (PMC7389876; doi:10.1186/s12866-020-01919-z), 2020-07-28
Supplement: 12866_2020_1919_MOESM1_ESM.pdf [file 12866_2020_1919_MOESM1_ESM.pdf]

# **Supplemental Information**

**Essential role of *Salmonella* Enteritidis DNA adenine methylase in modulating inflammasome activation**

Yaxin Guo, Dan Gu, Tingting Huang, Liyan Cao, Xinyu Zhu, Yi Zhou, Kangru Wang,  
Xilong Kang, Chuang Meng, Xinan Jiao, Zhiming Pan

# Figure S1

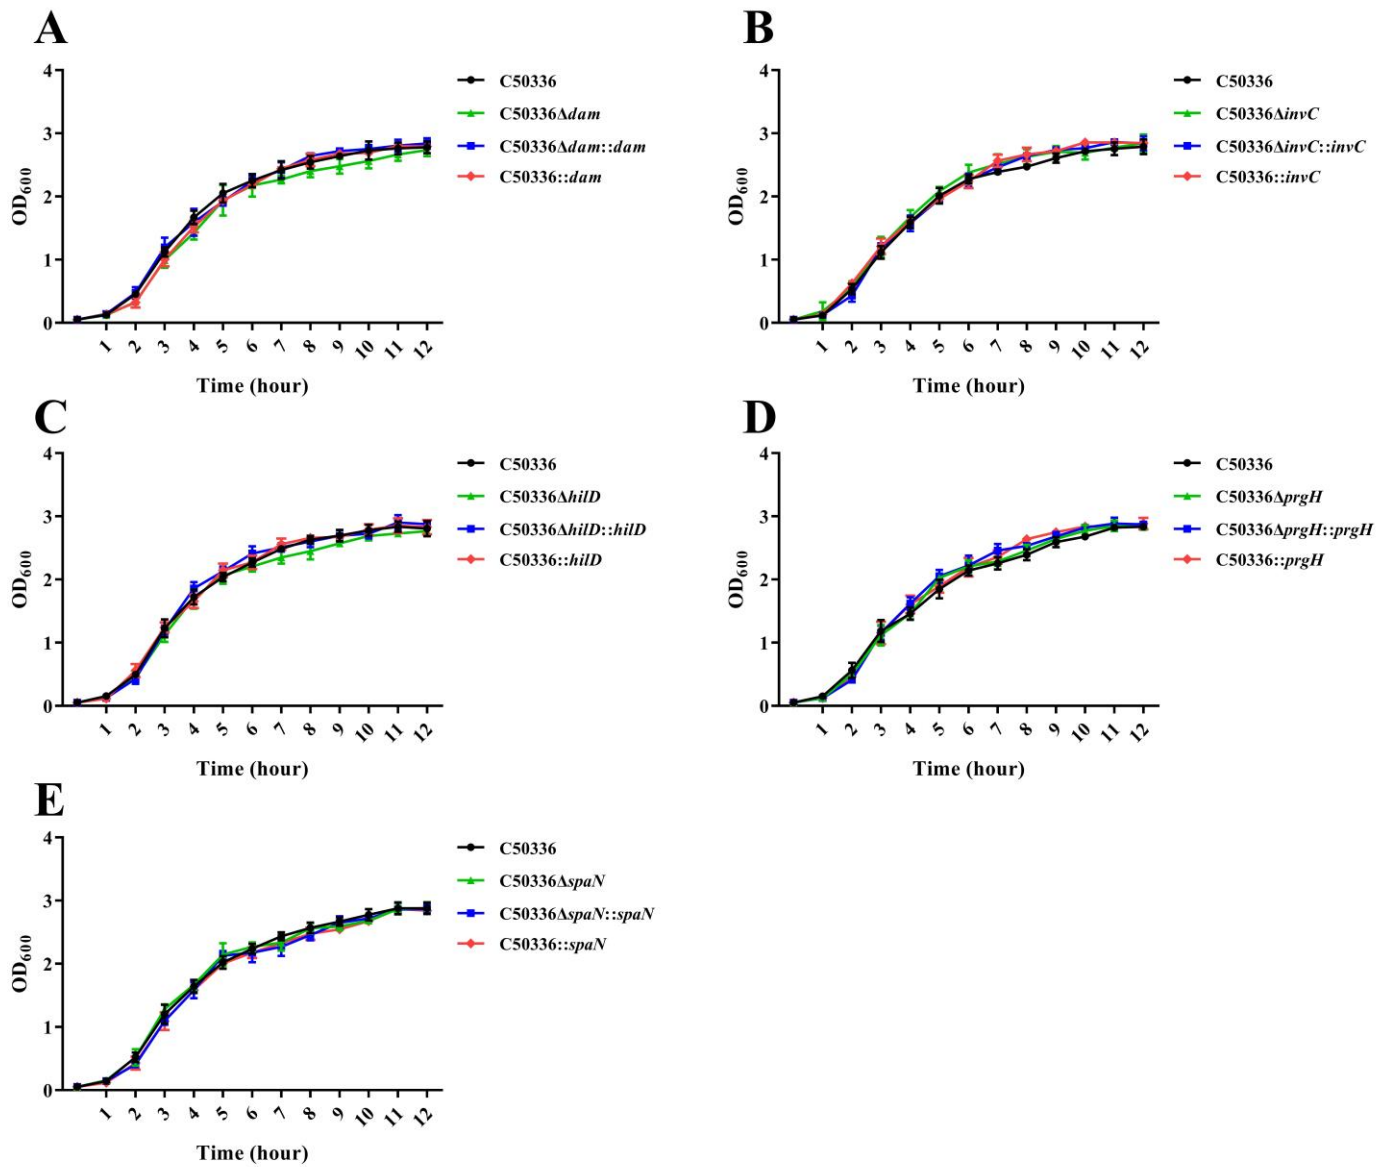

# Figure S2

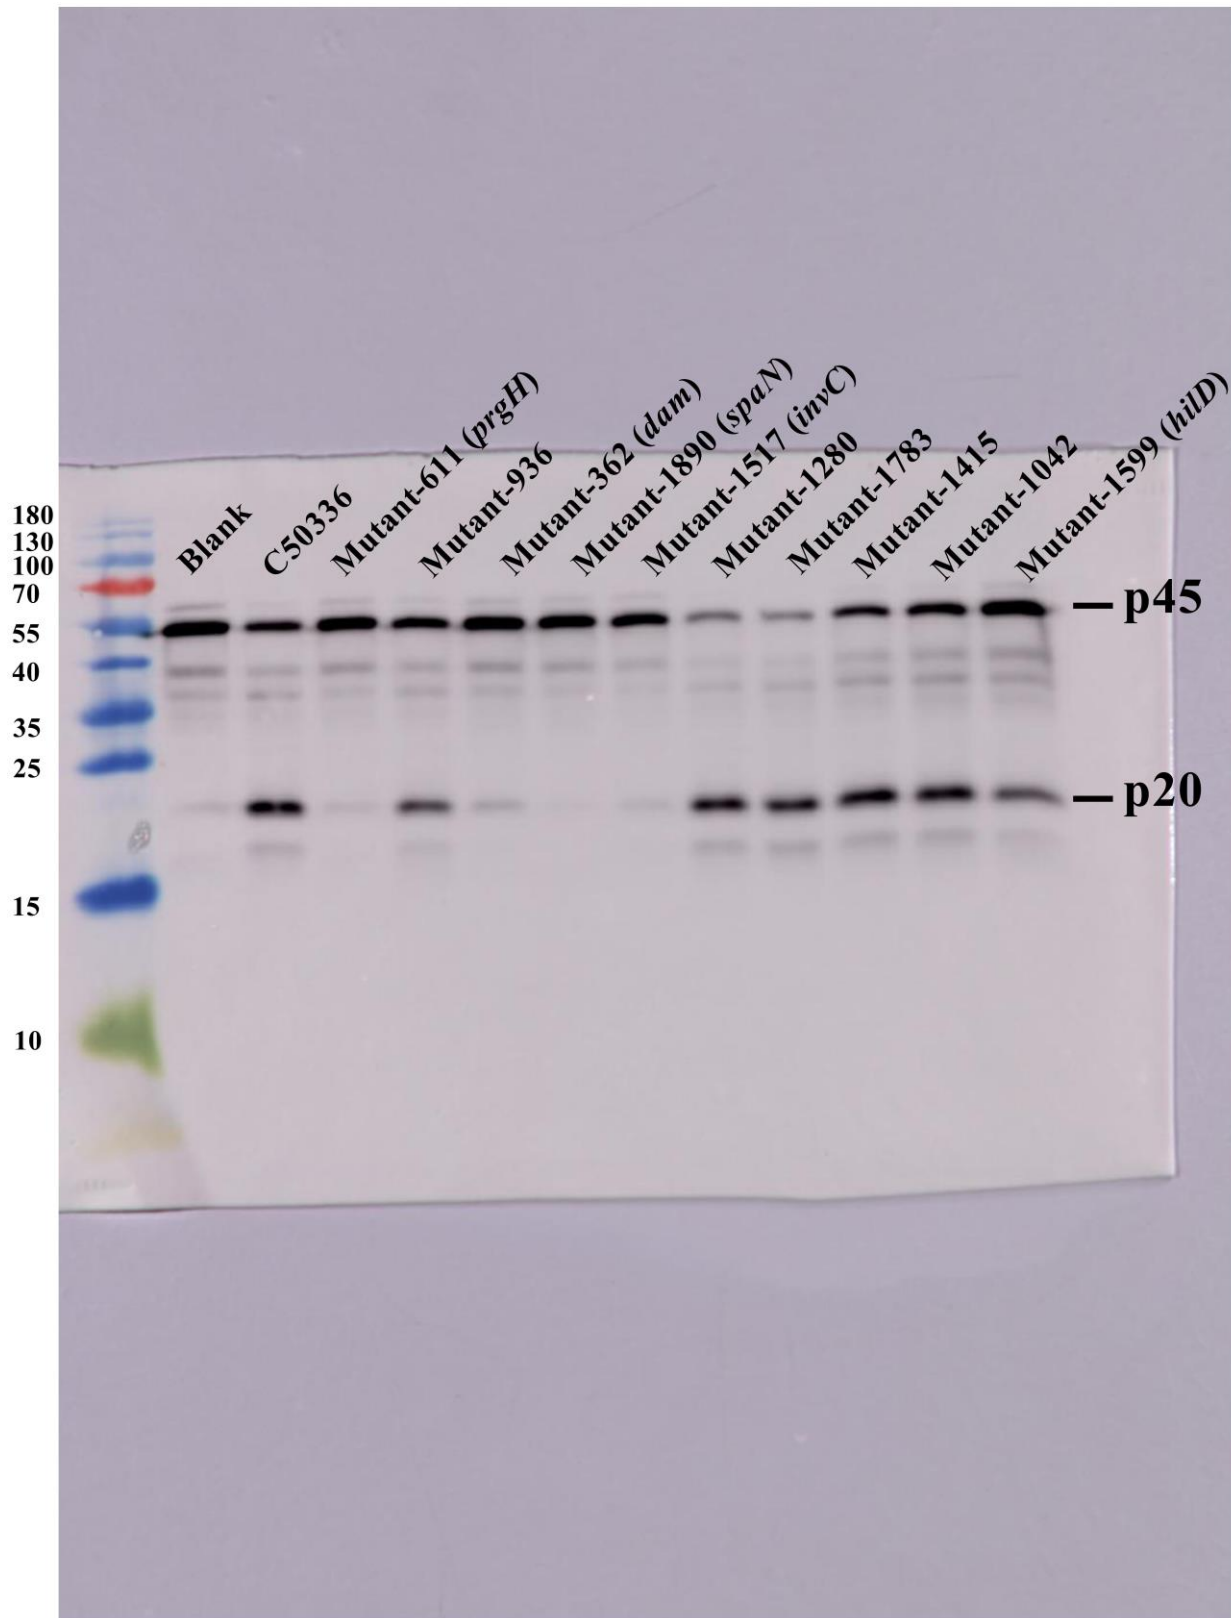

# Figure S2

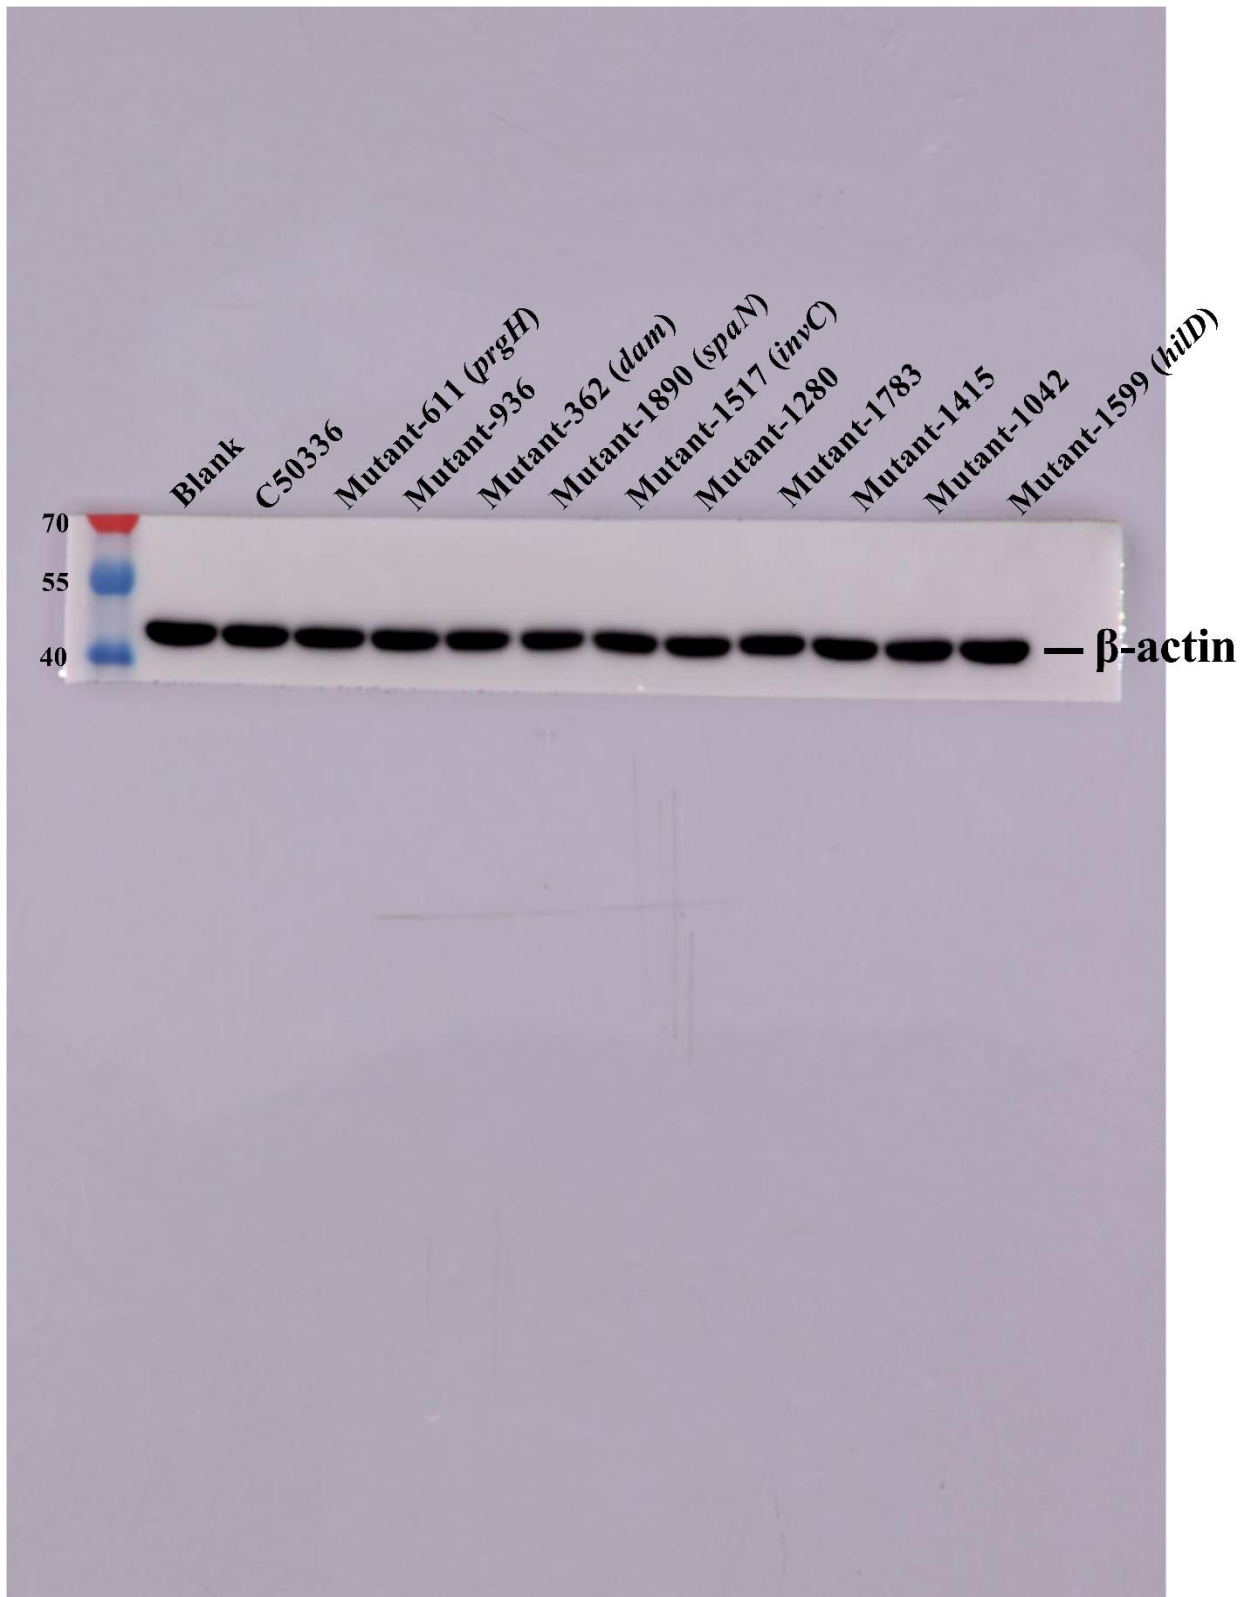

**Figure S3**

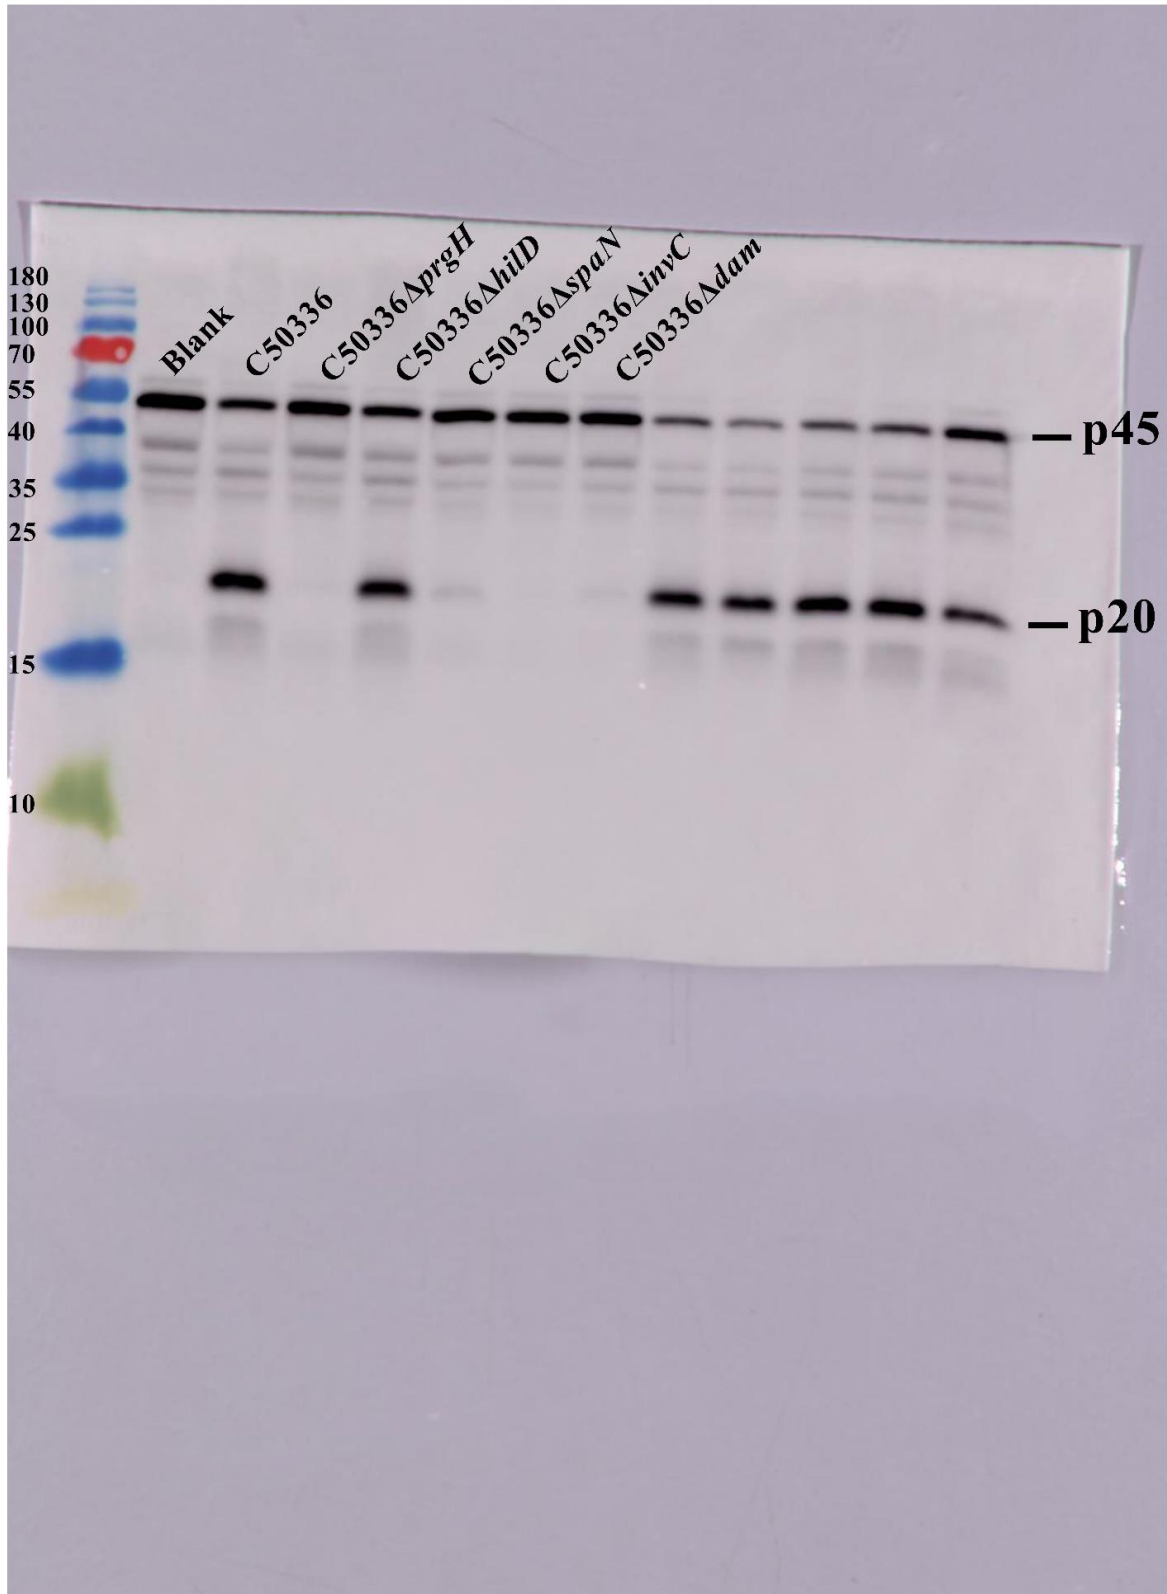

# Figure S3

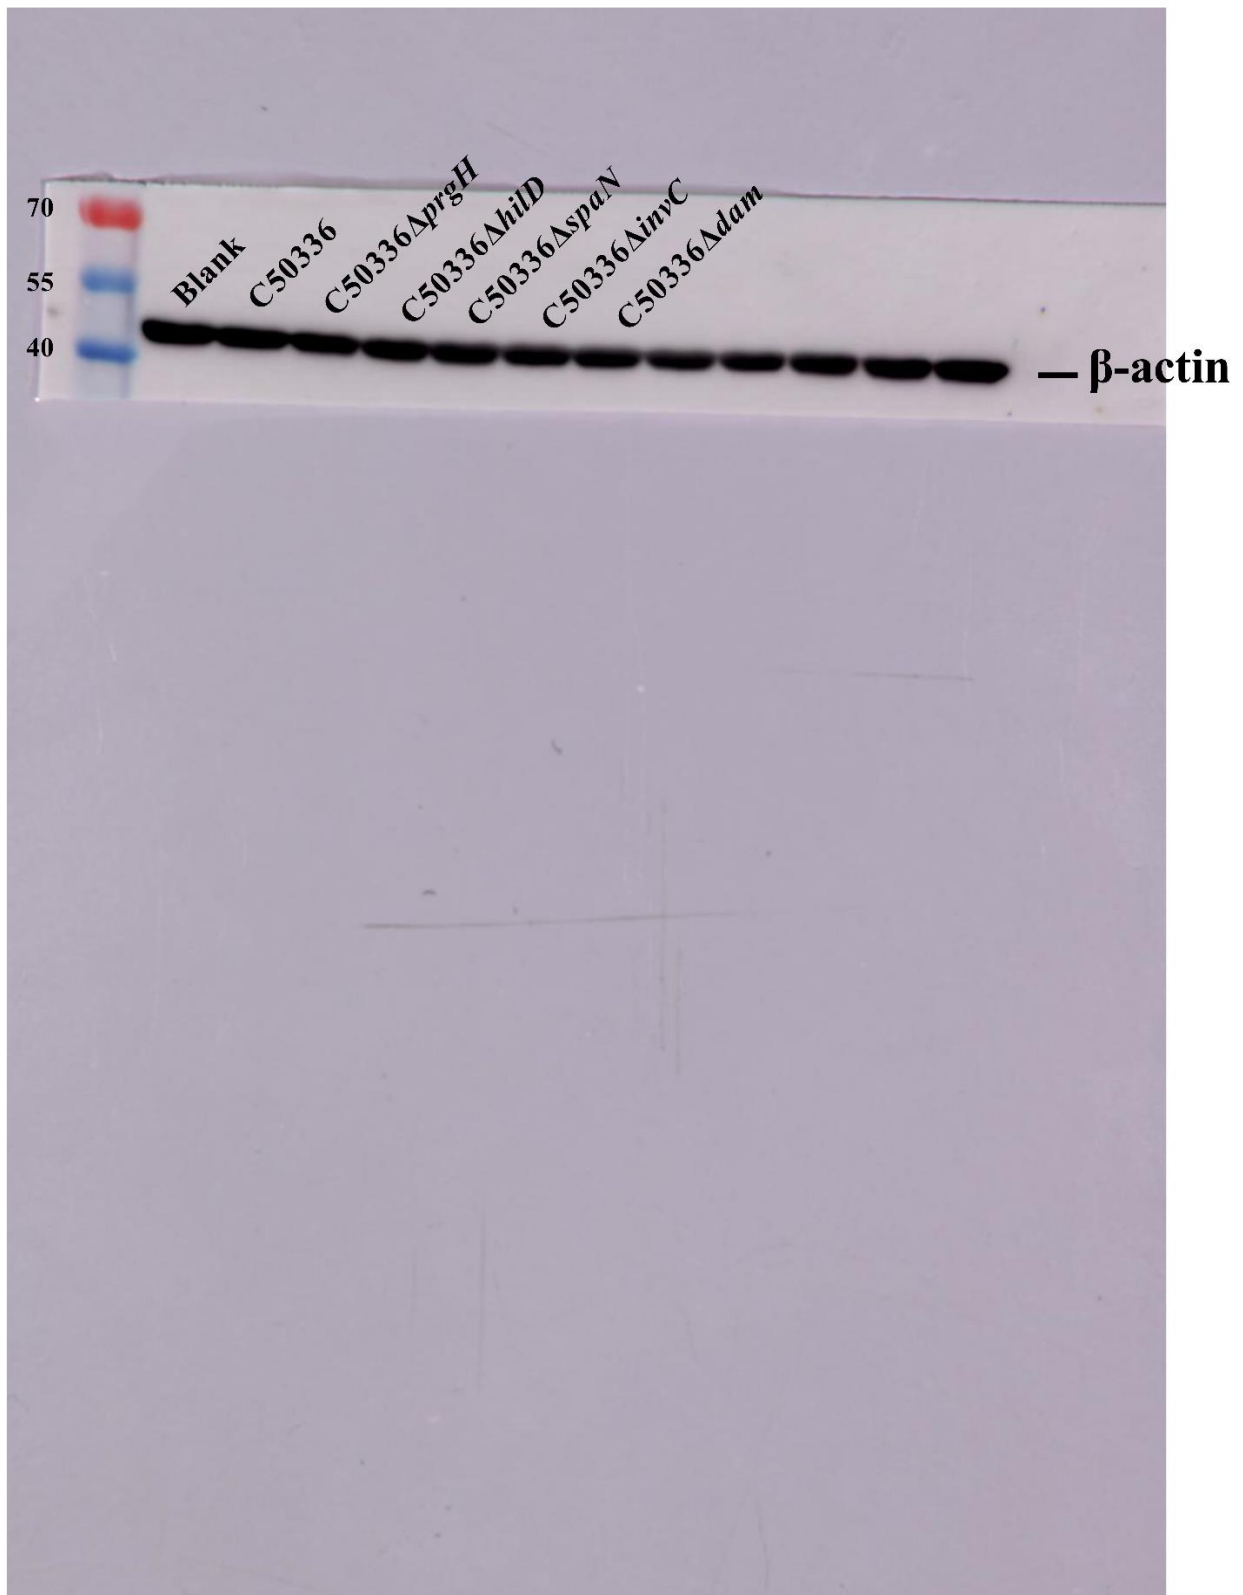

# Figure S4

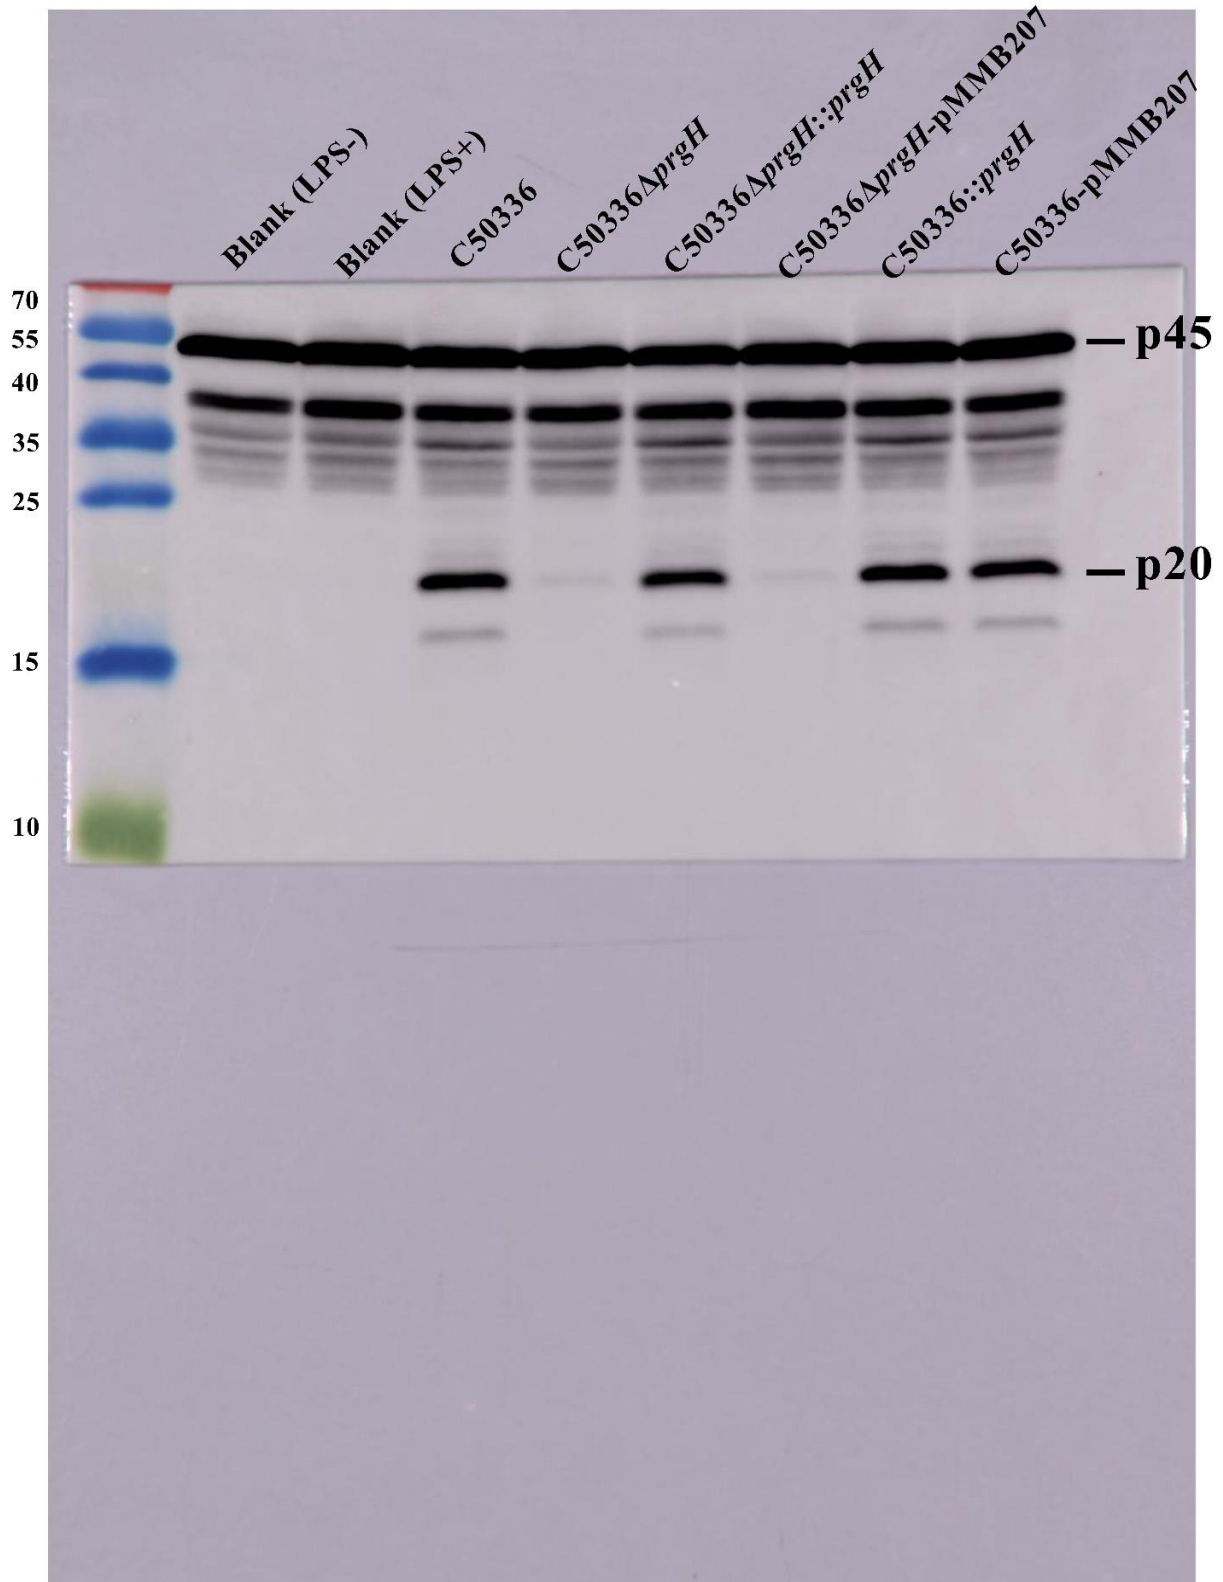

# Figure S4

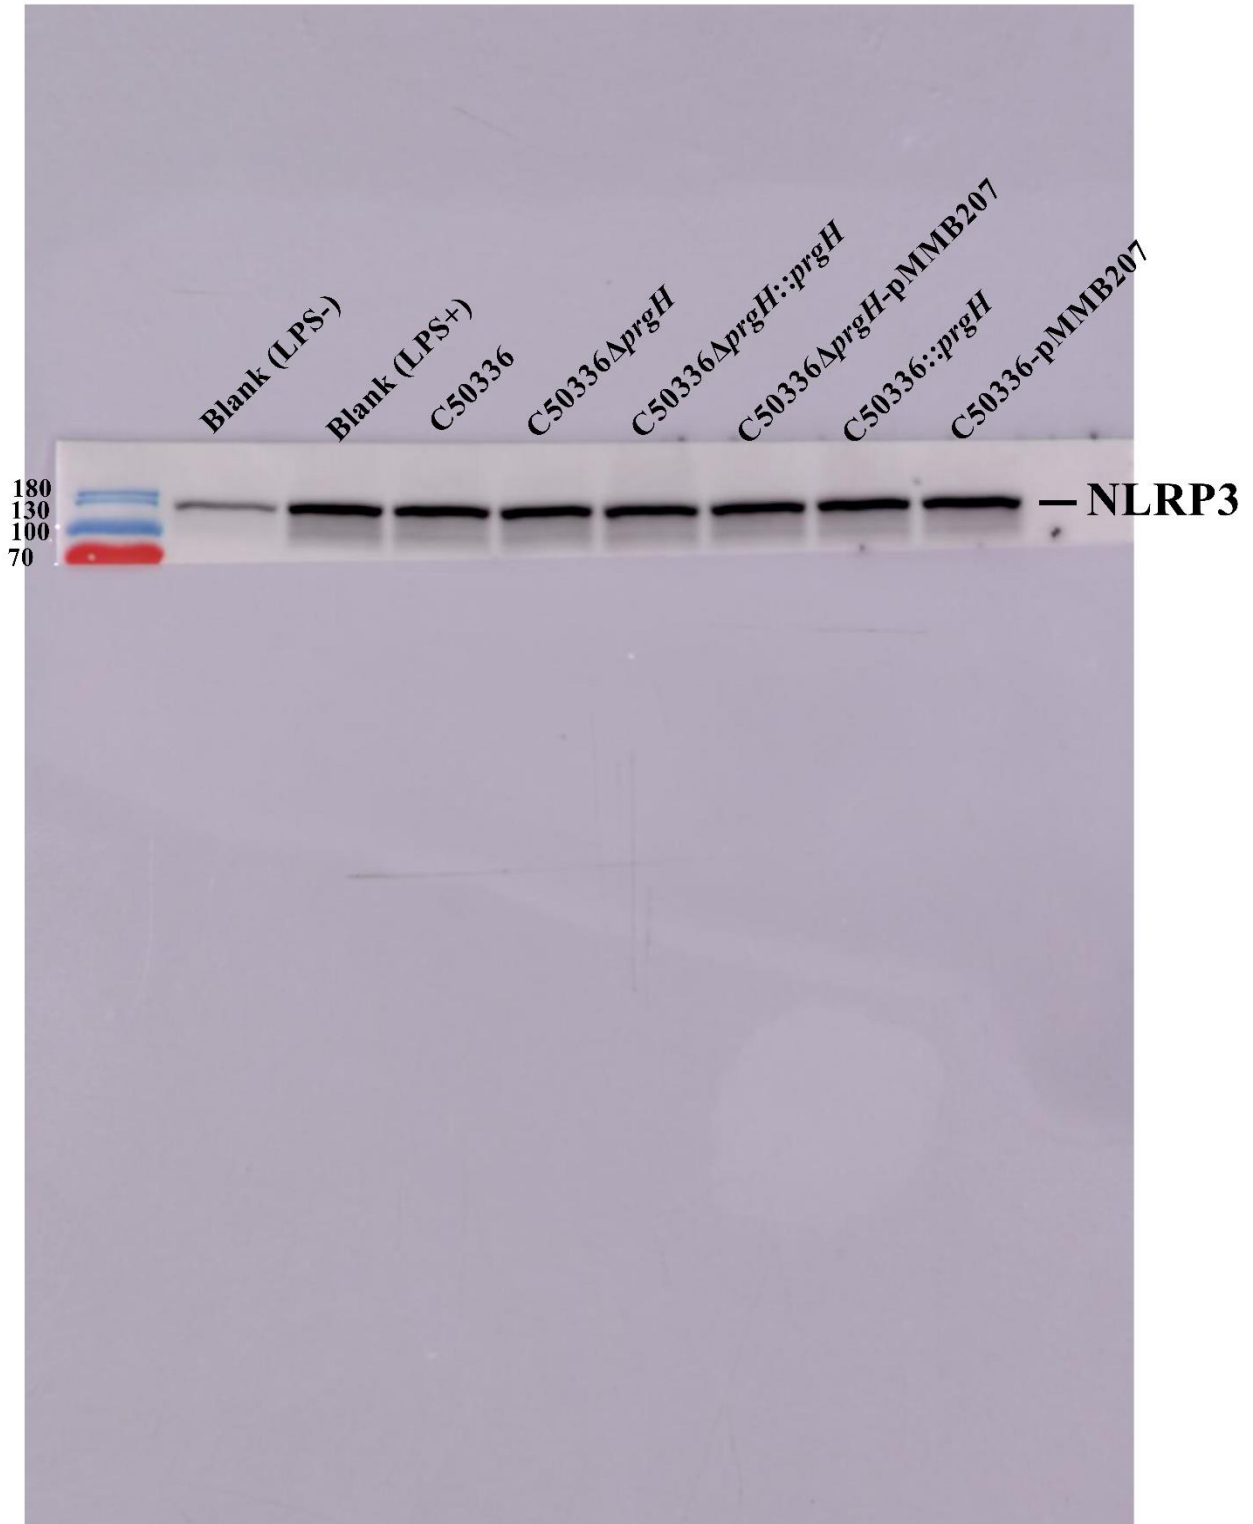



**Figure S4**

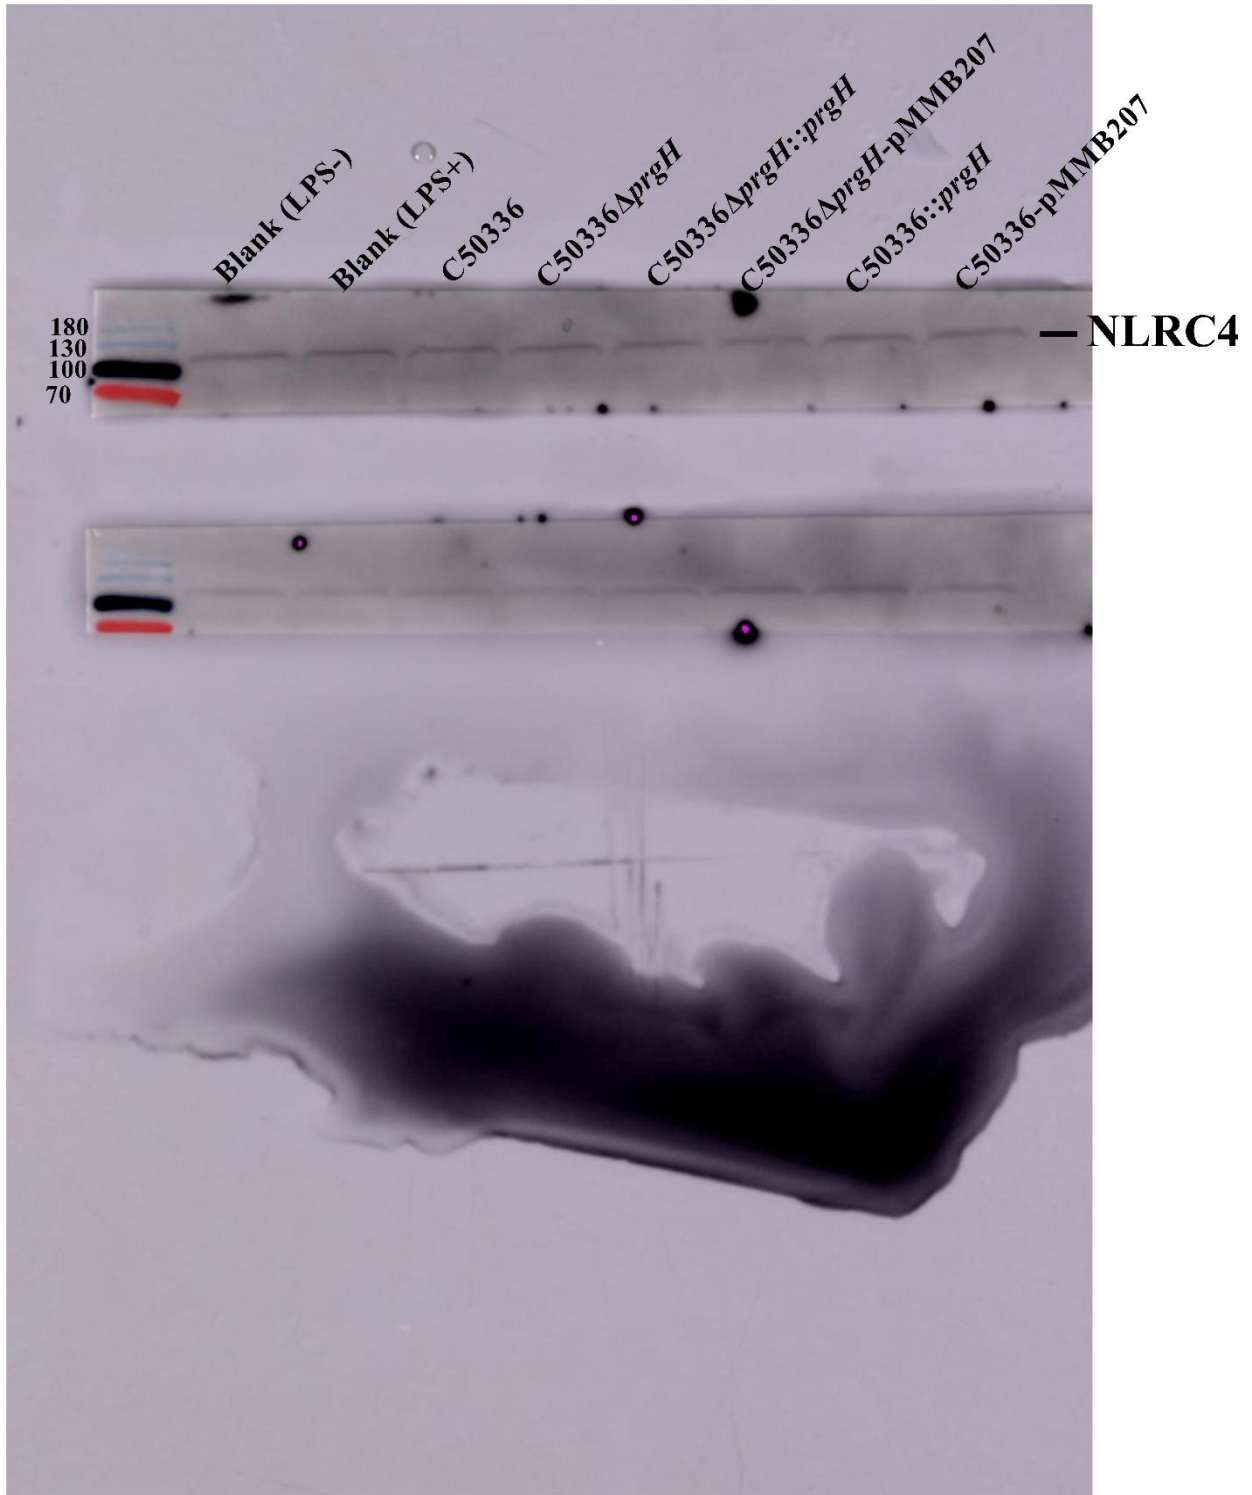

# Figure S4

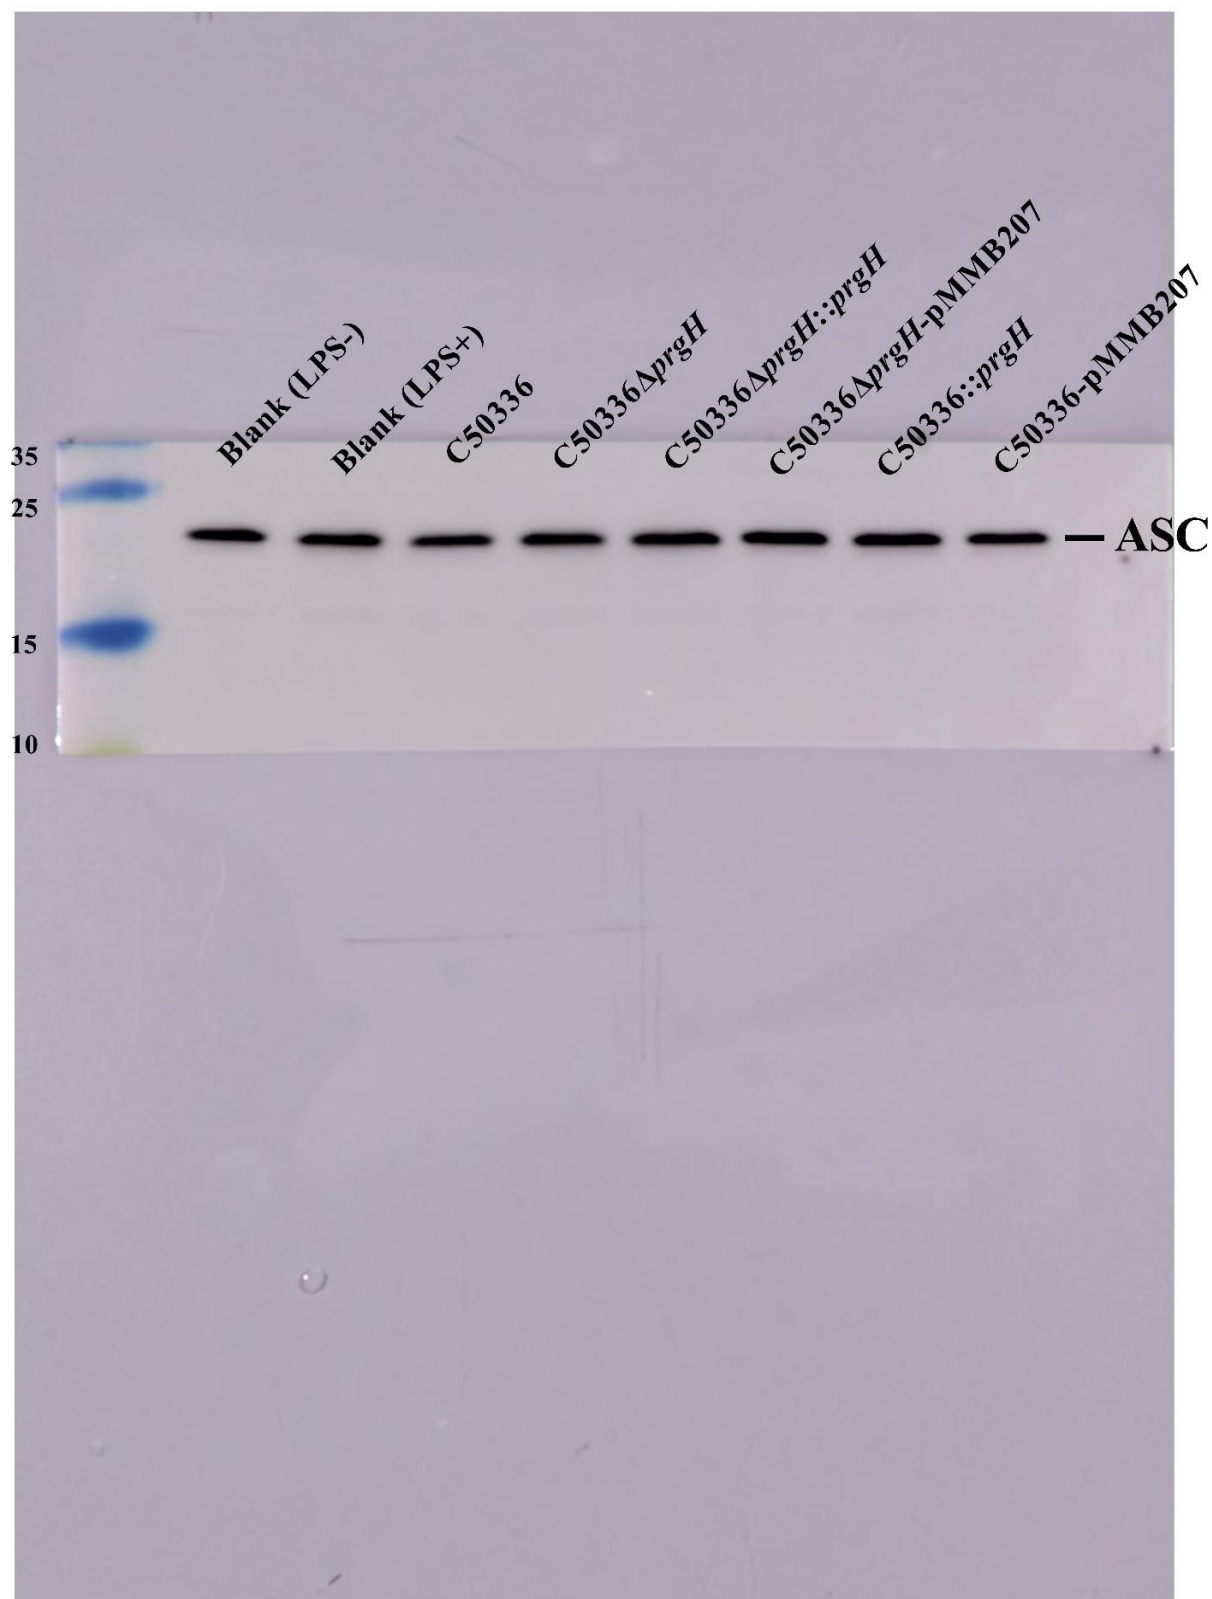

# Figure S4

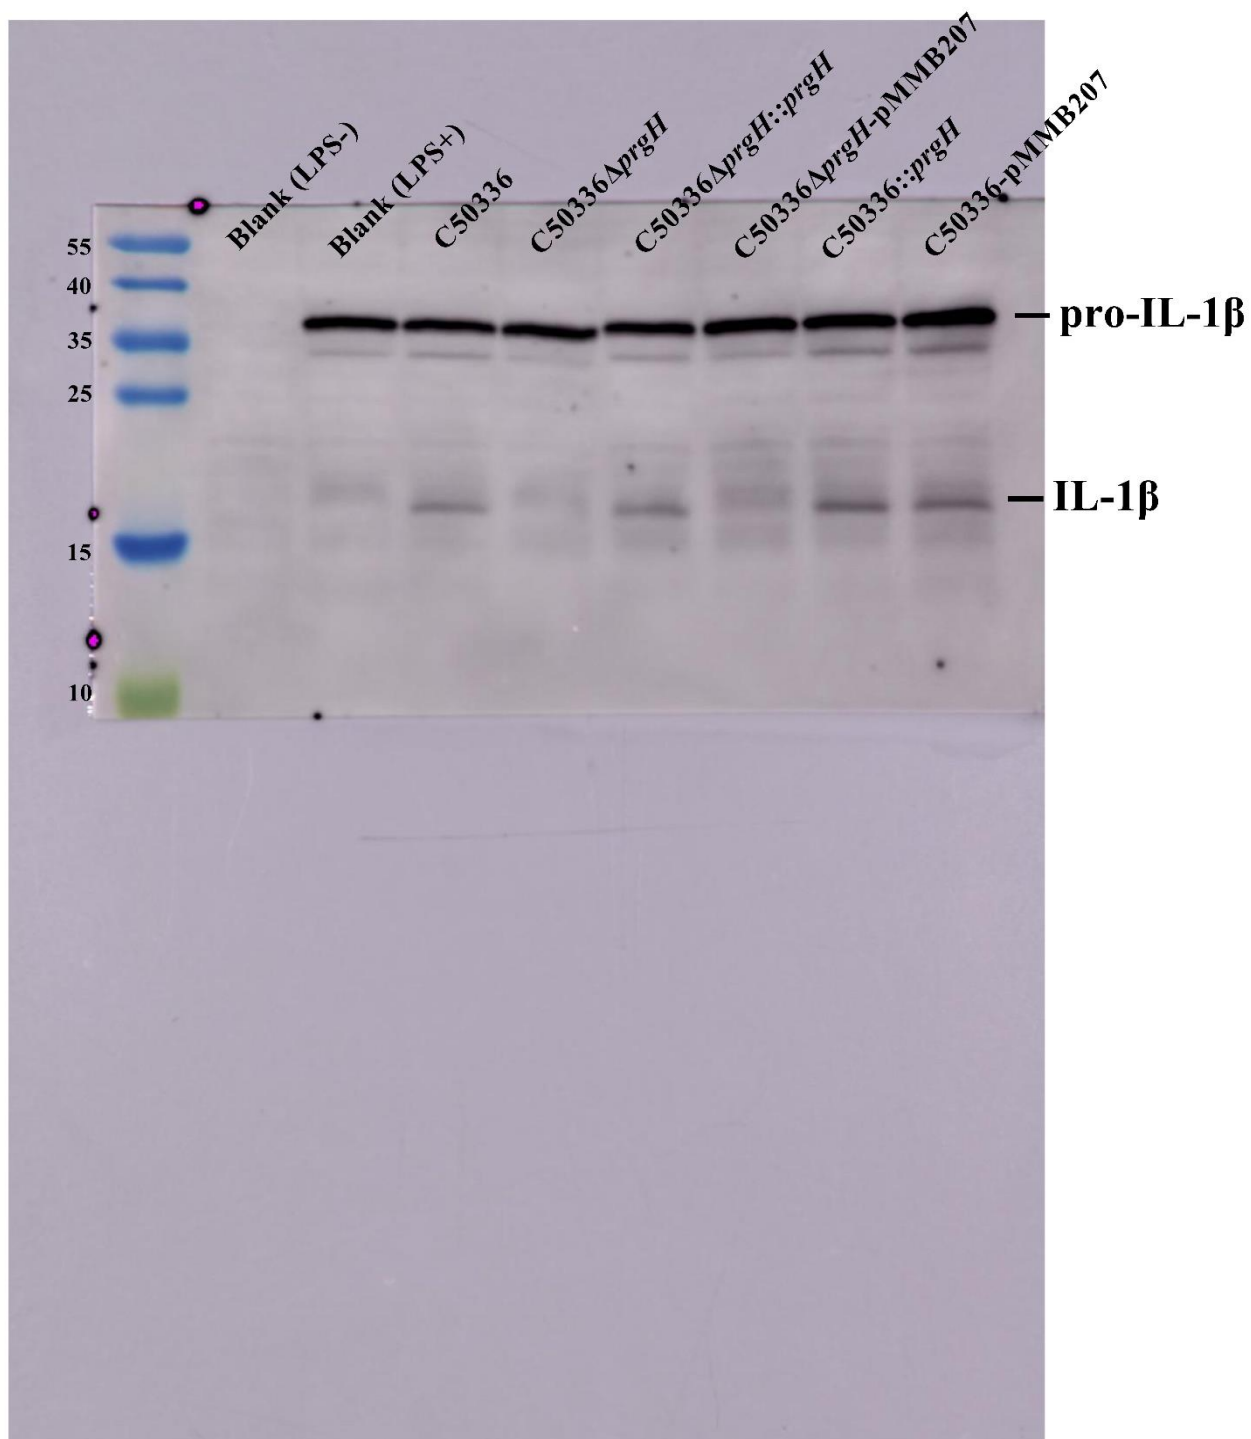

# Figure S4

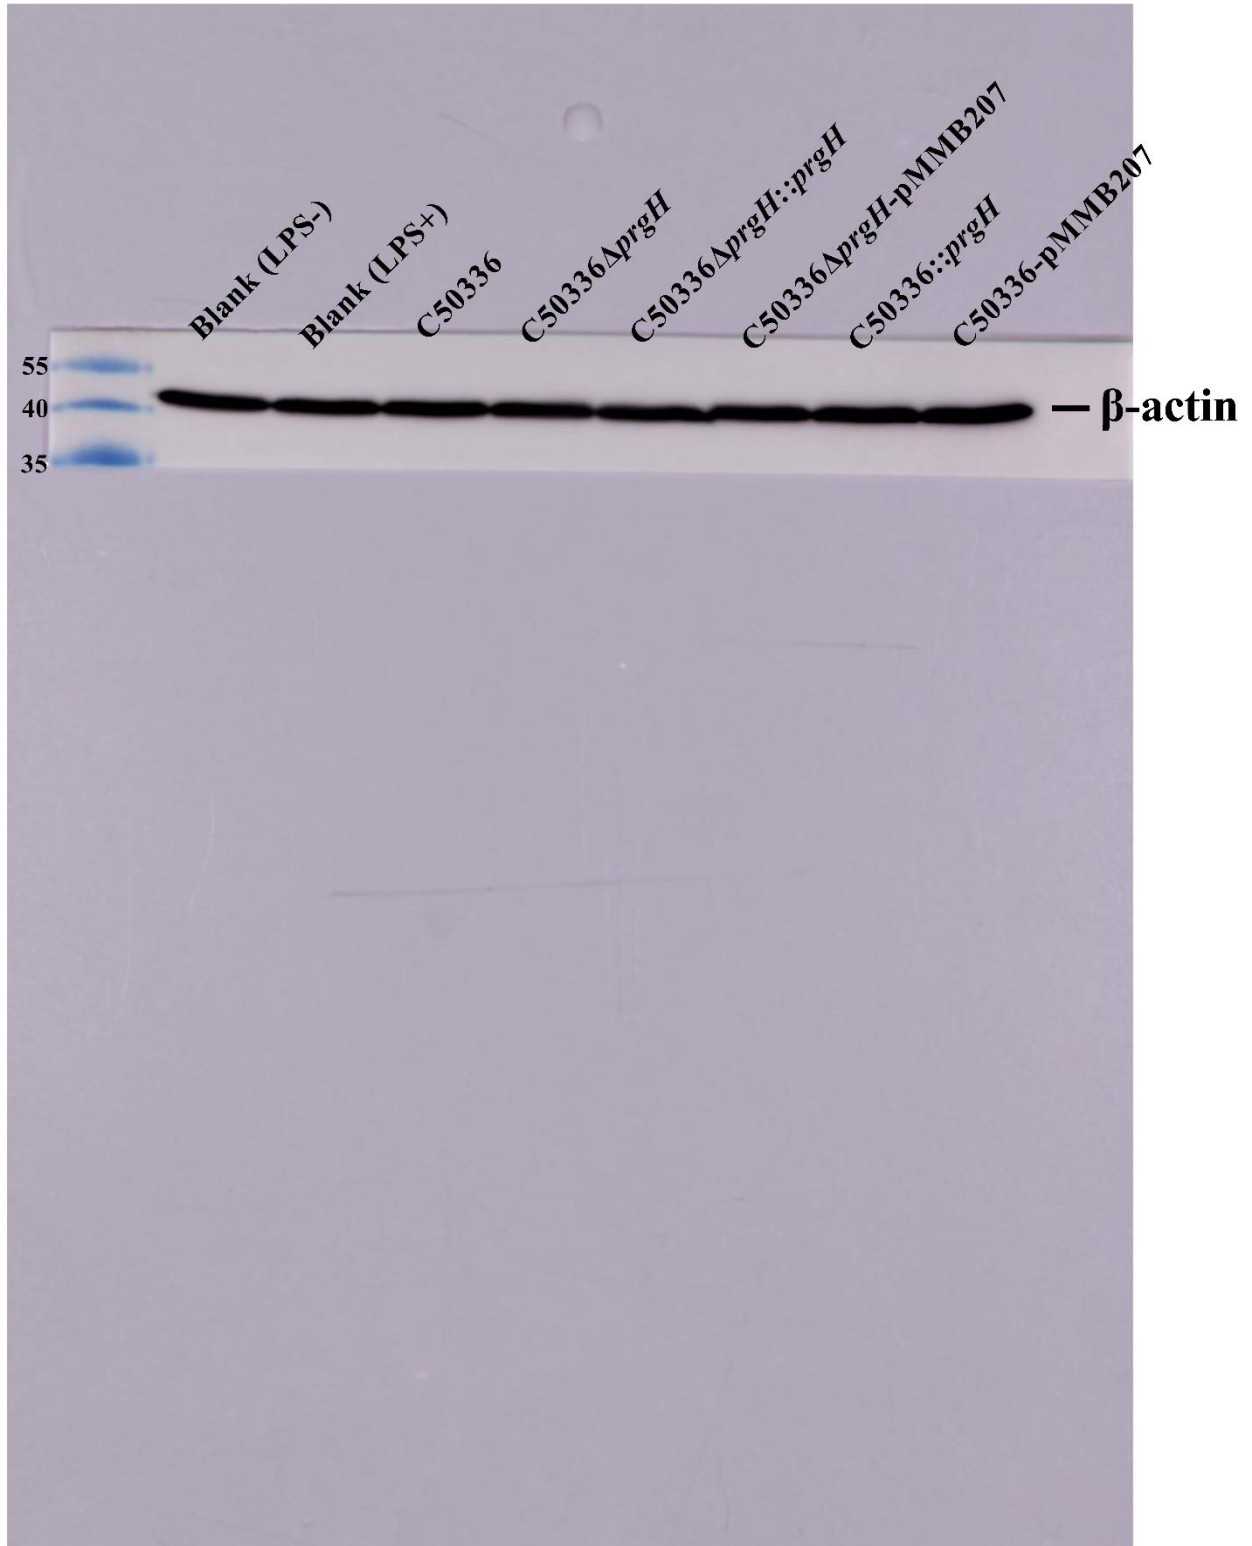

# Figure S5

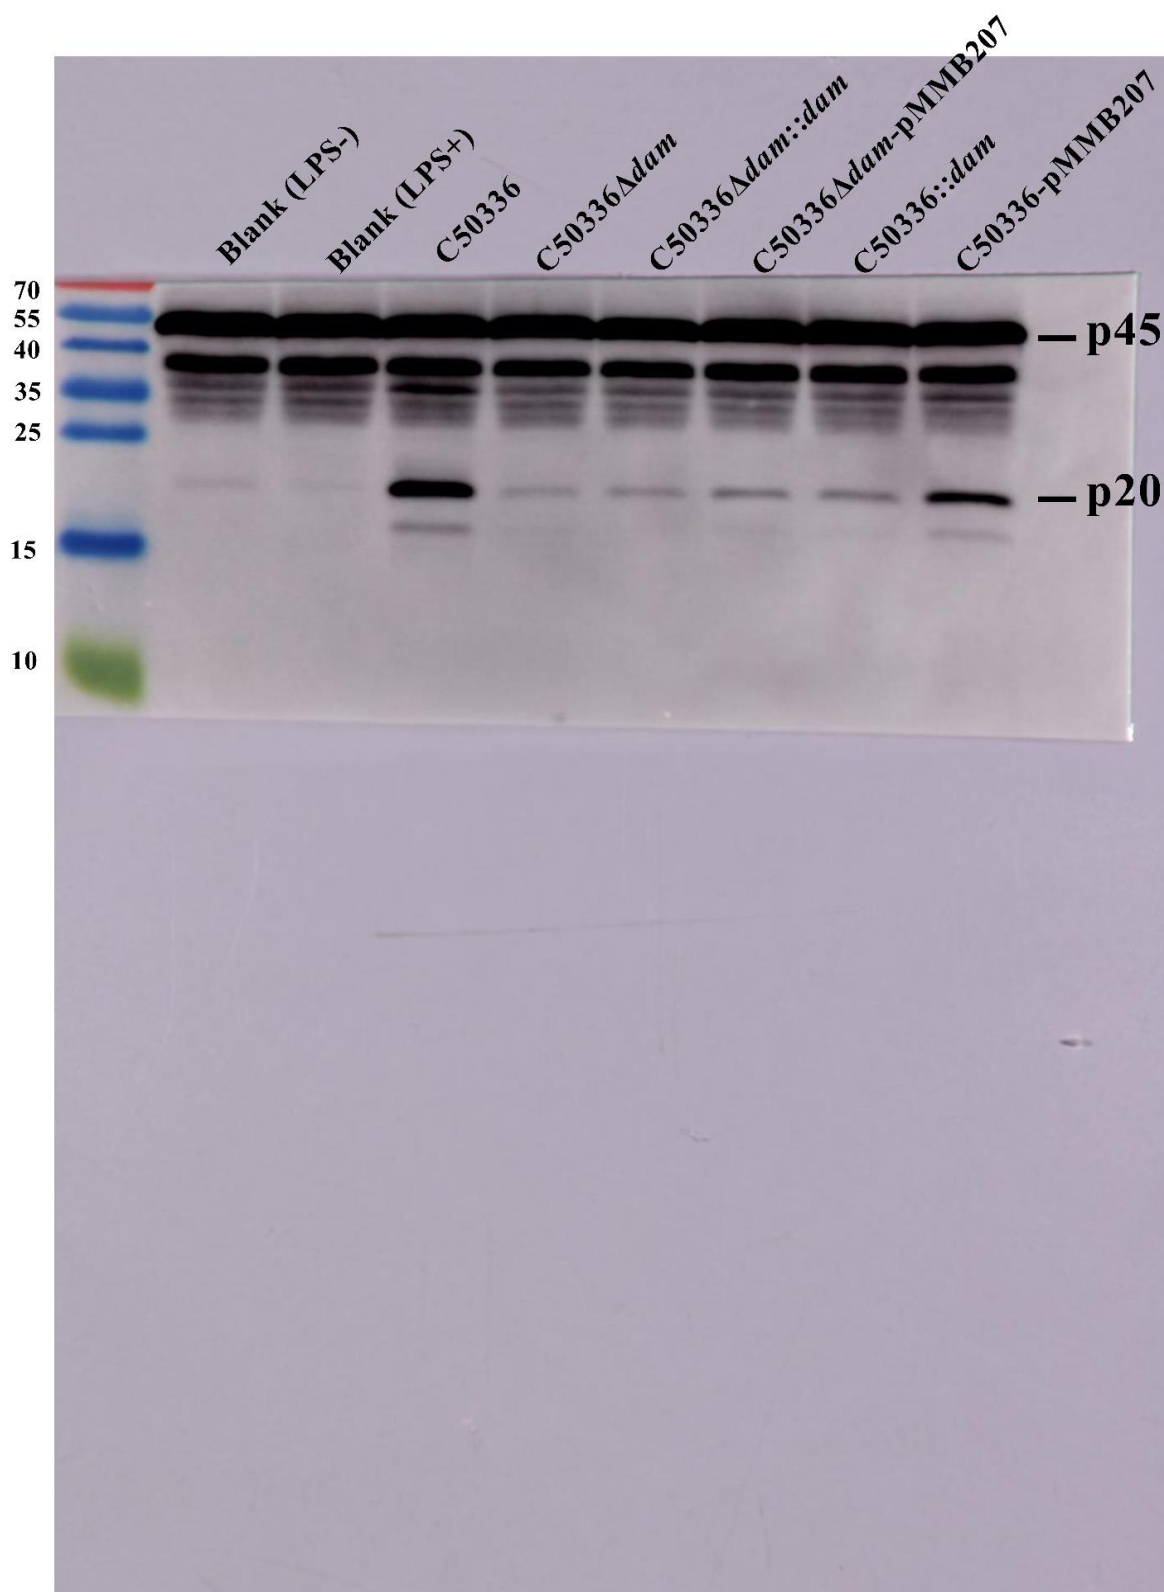

# Figure S5

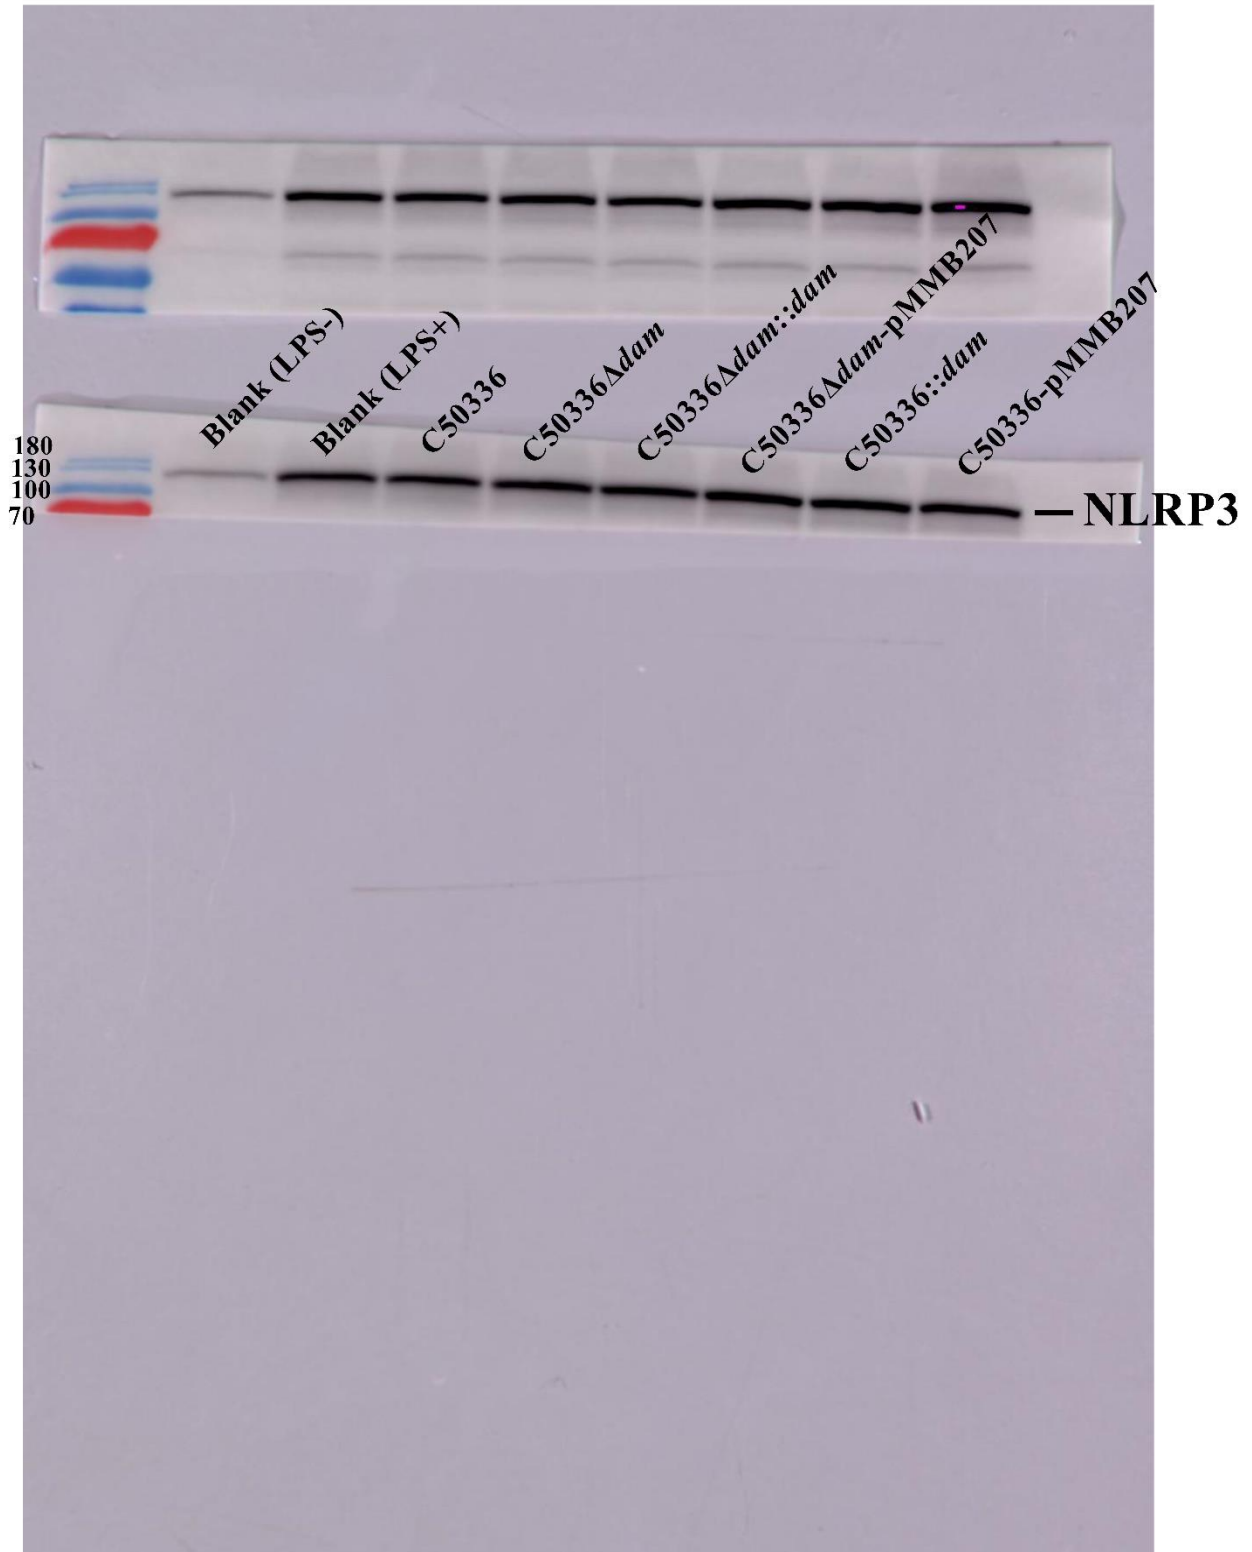

**Figure S5**

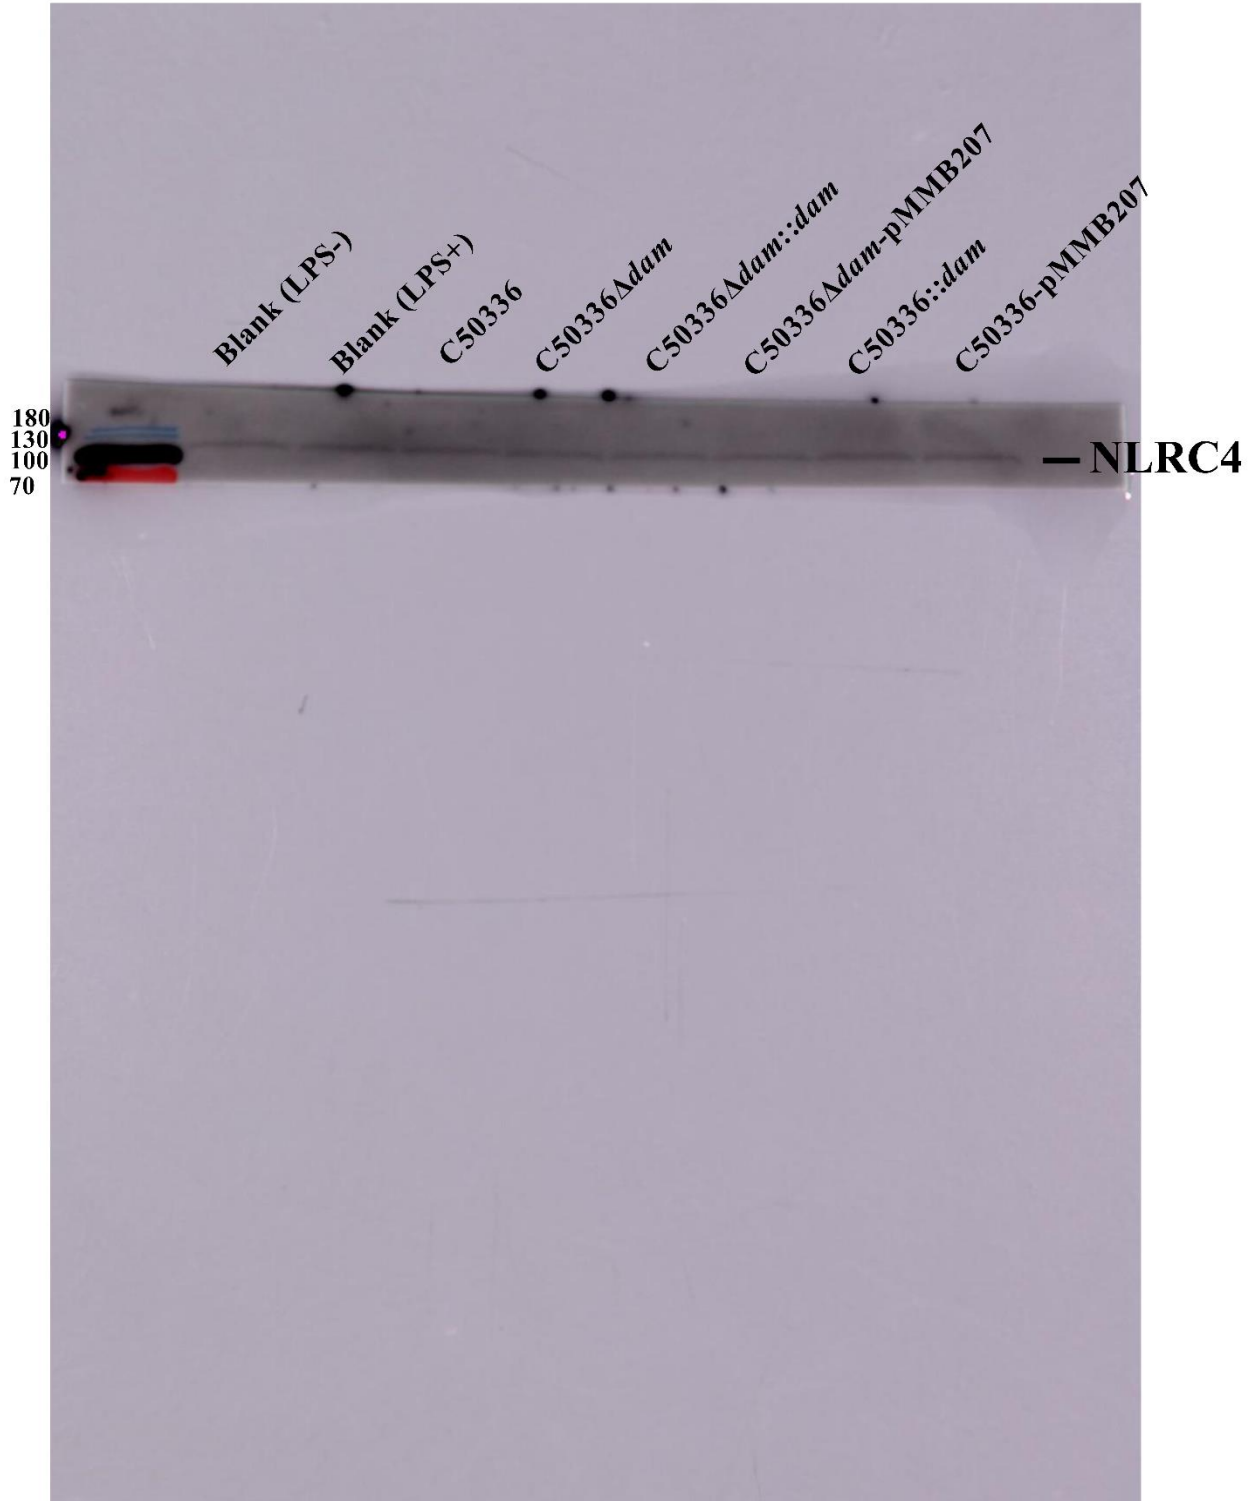

# Figure S5

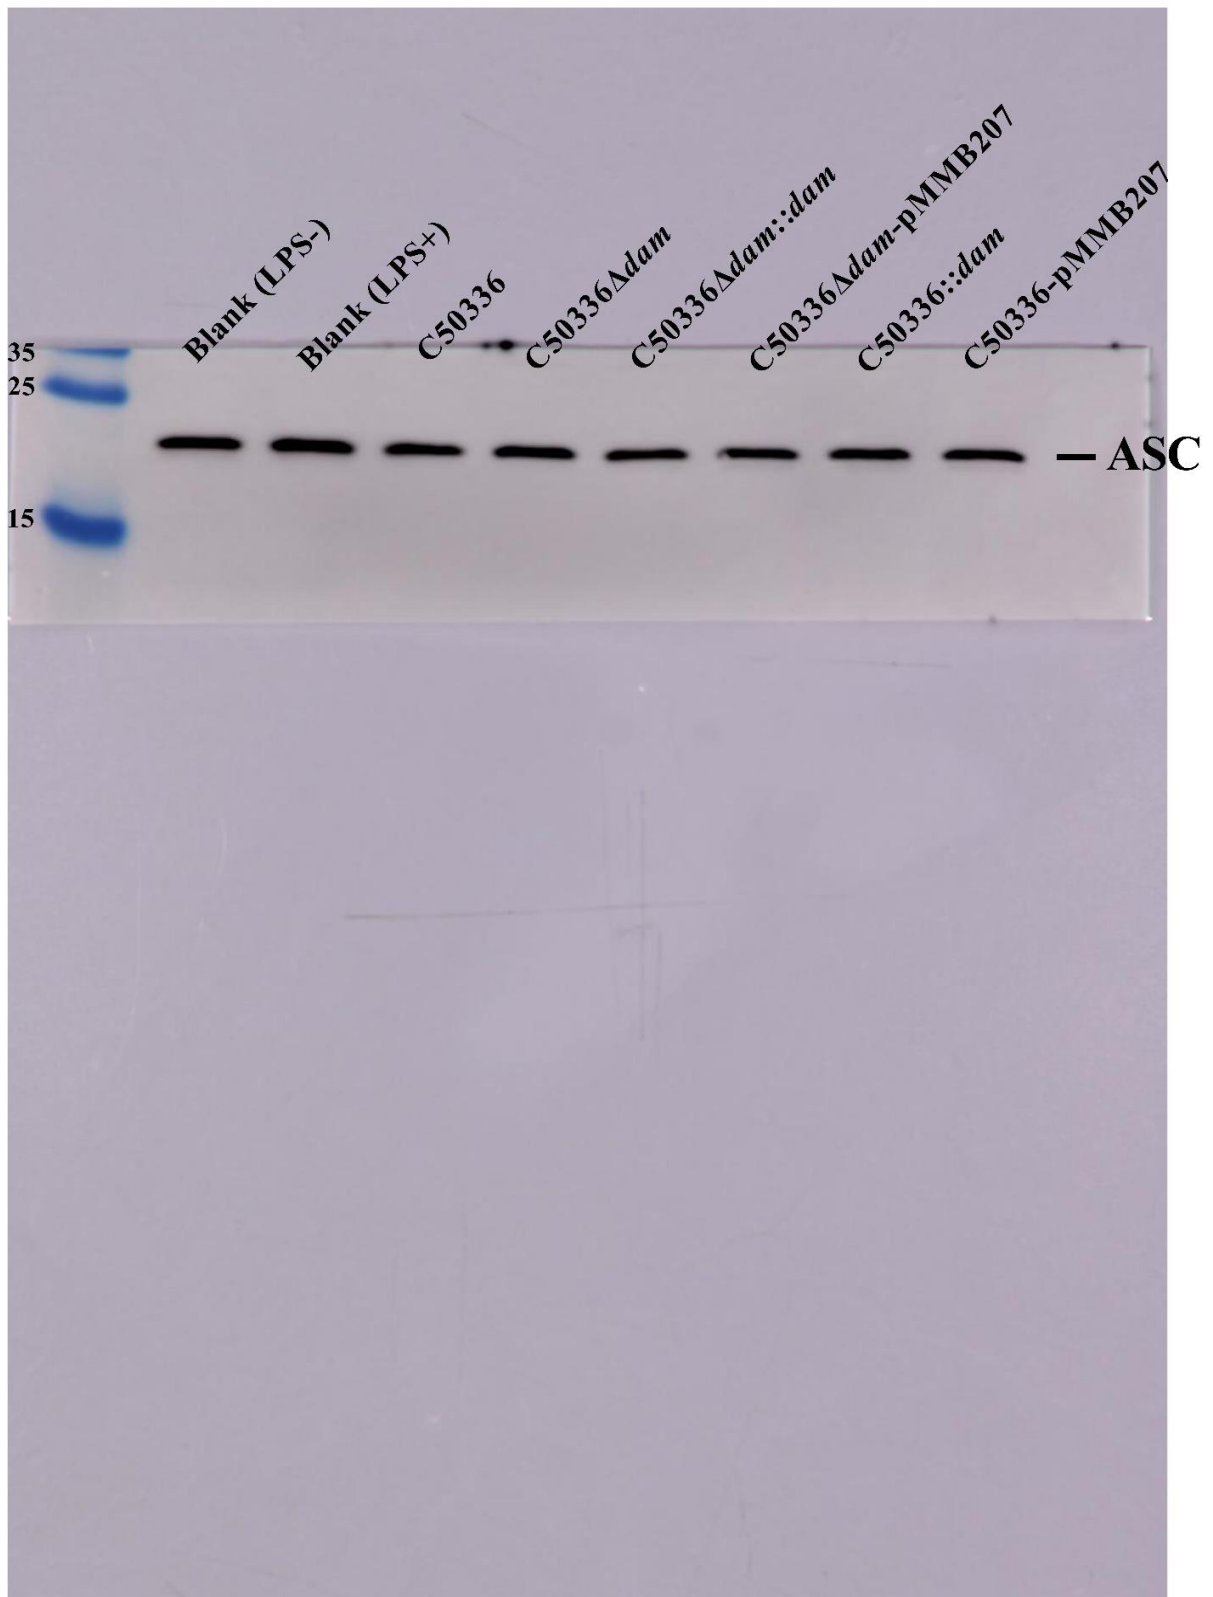



# Figure S5

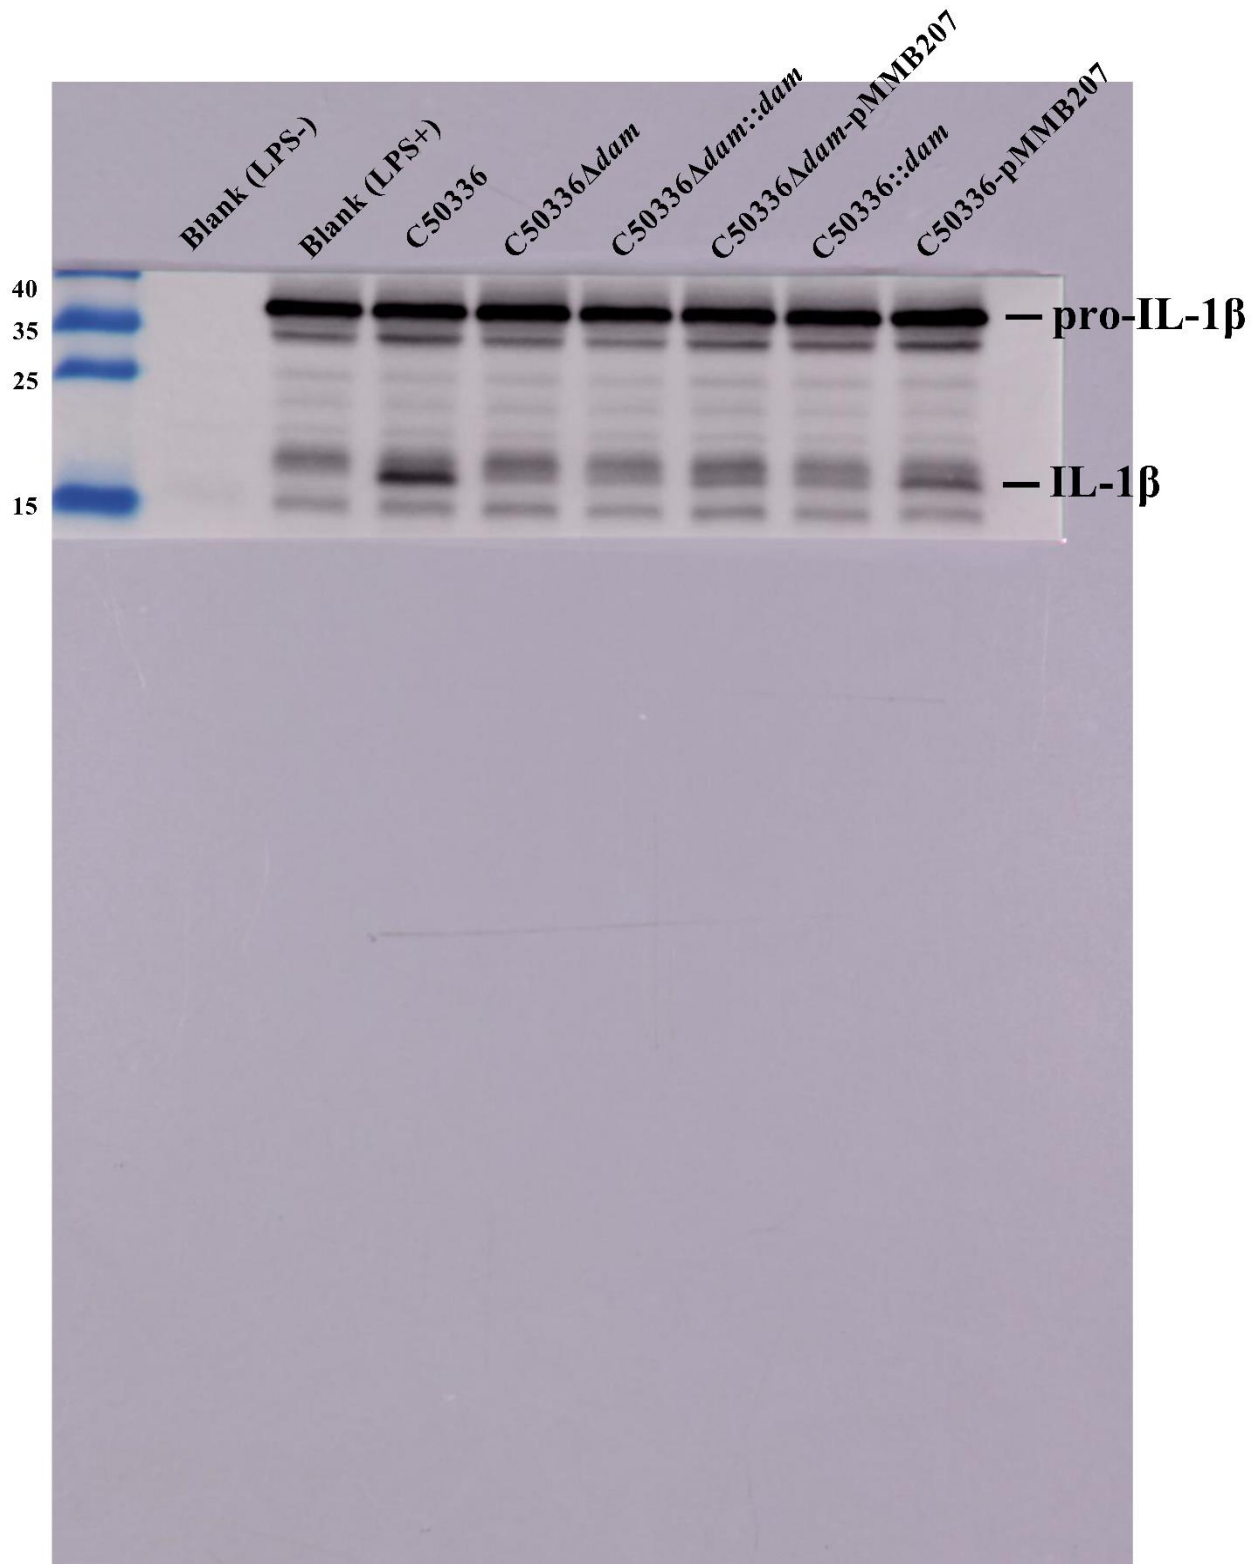

**Figure S5**

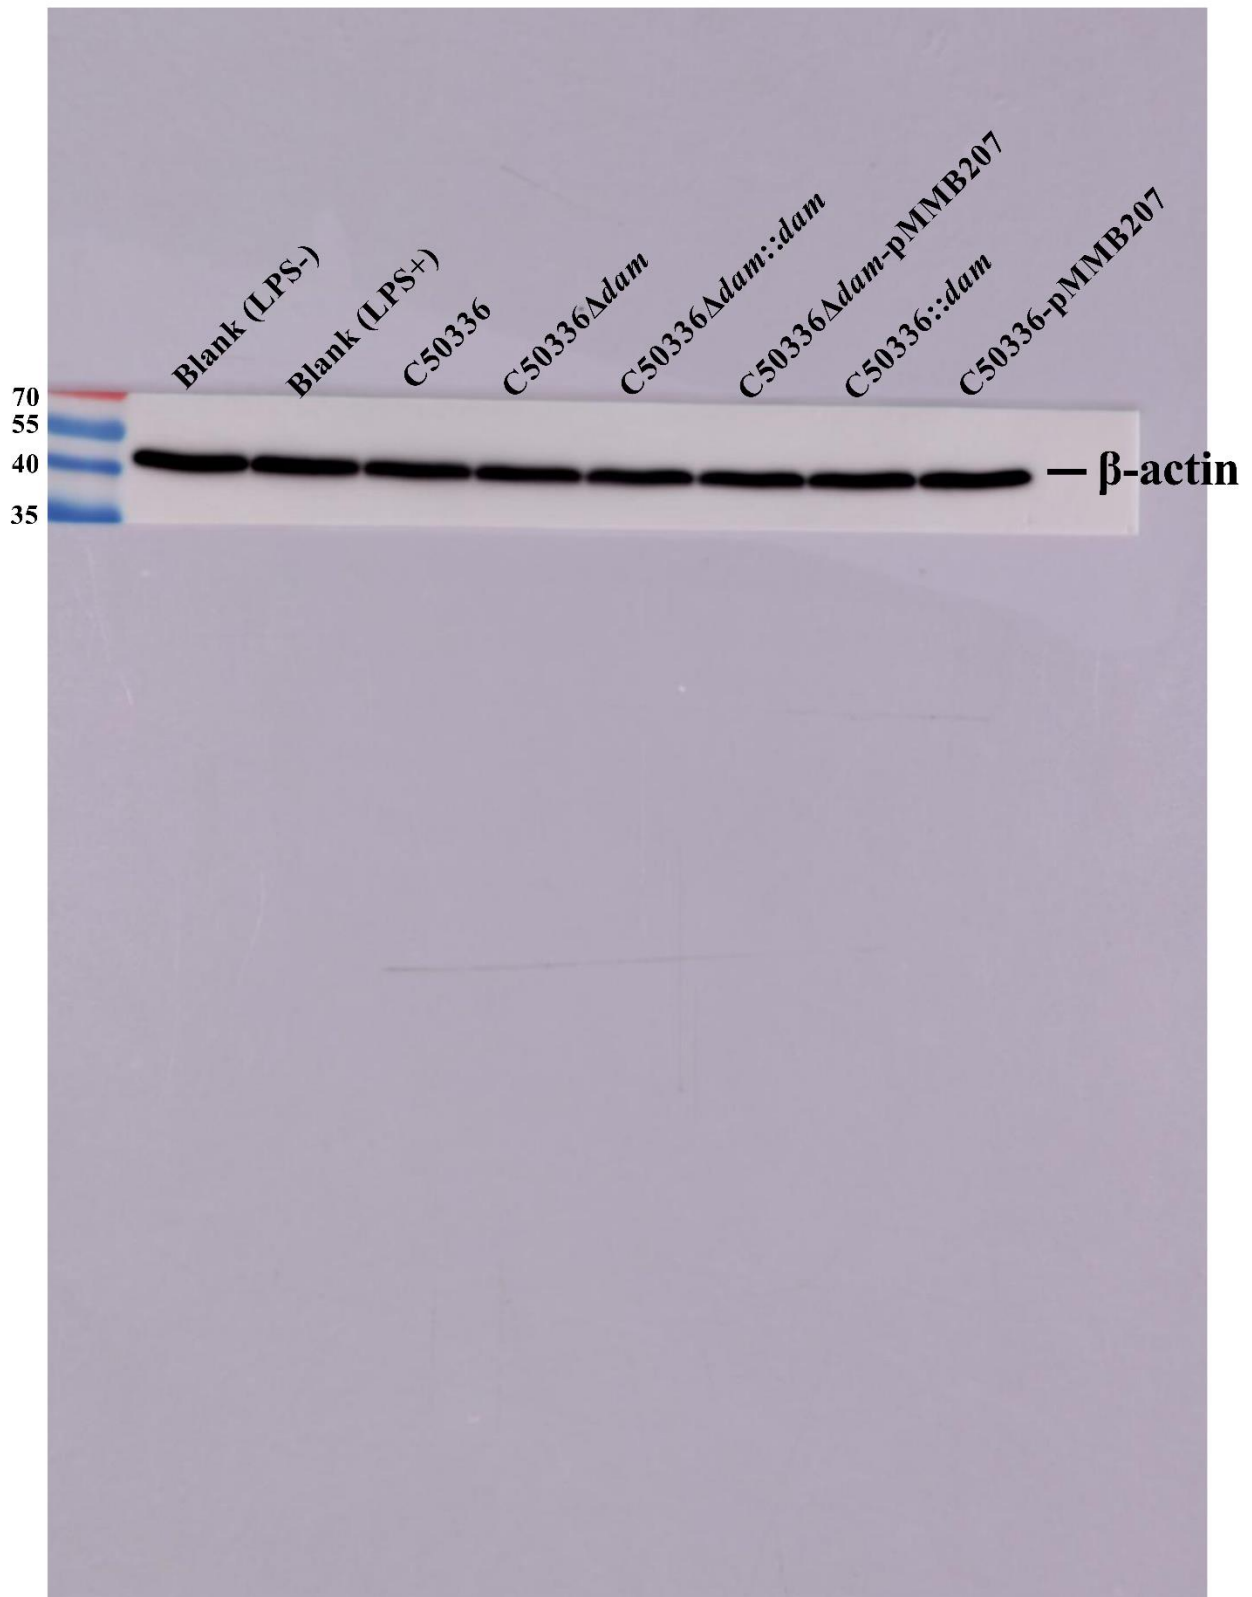

# Figure S6

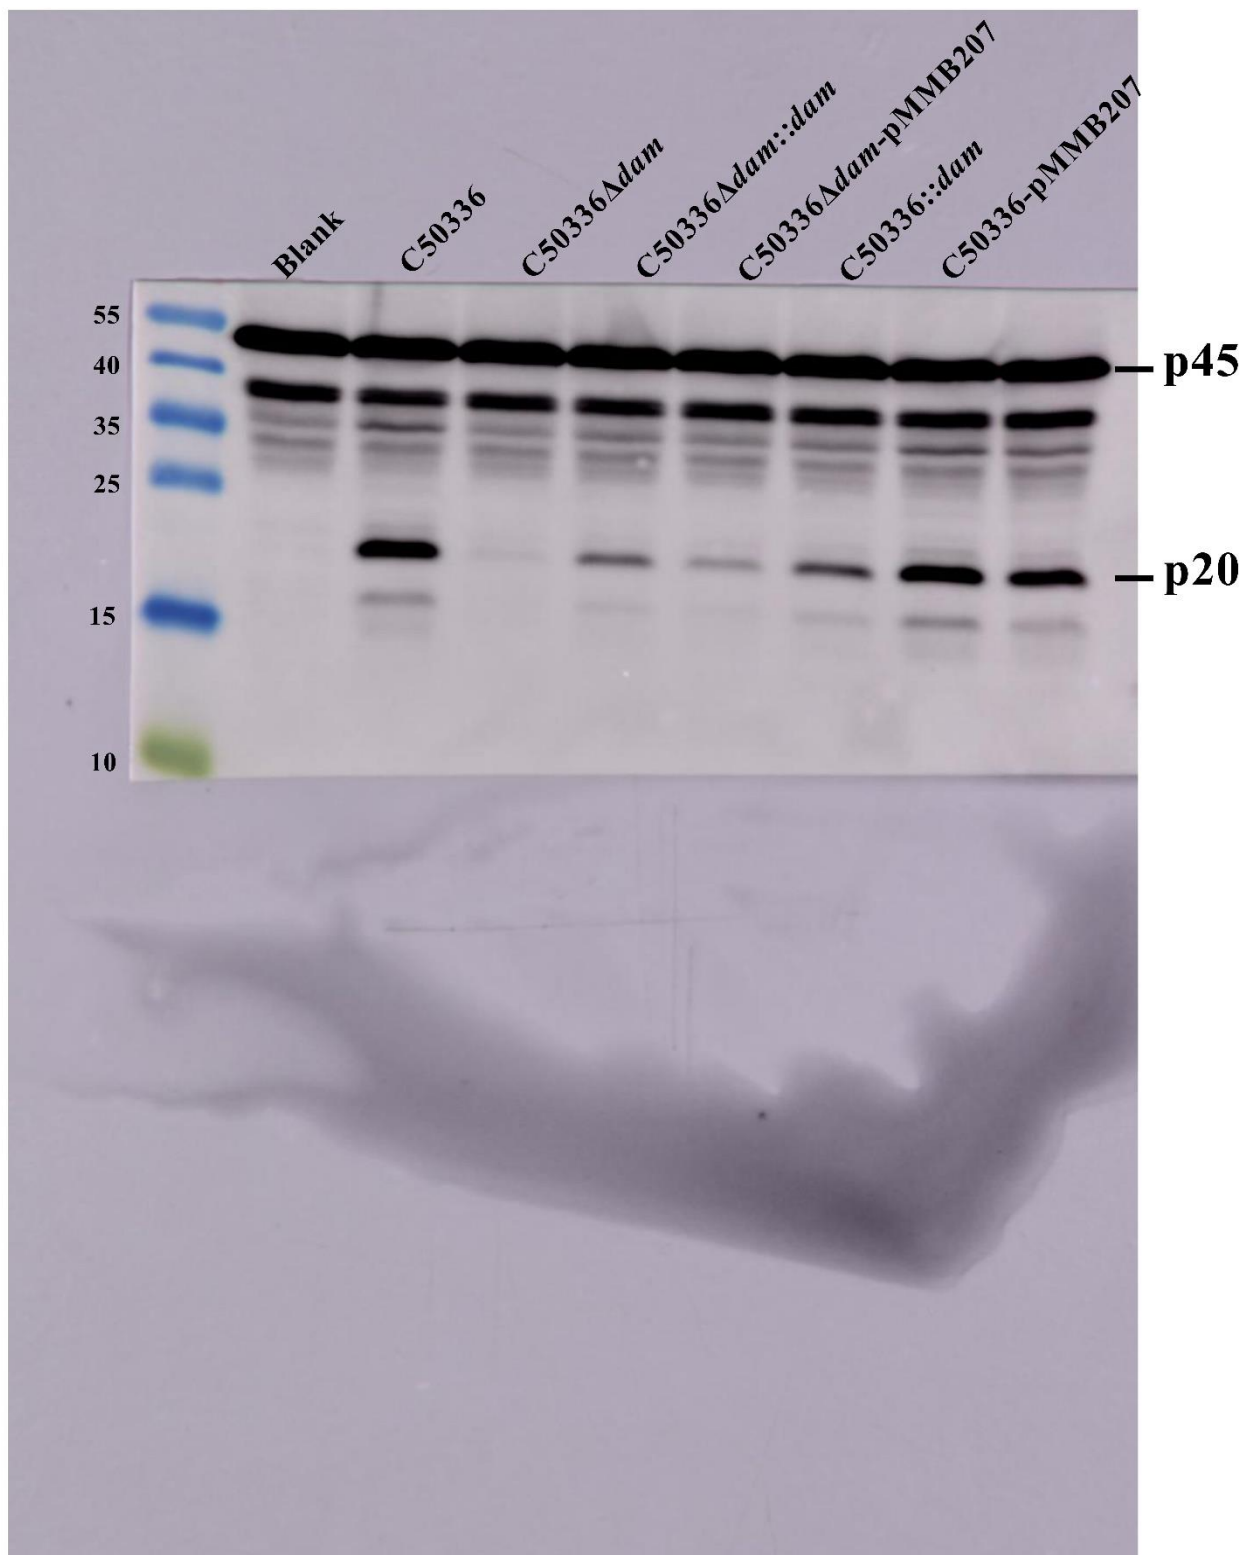

**Figure S6**

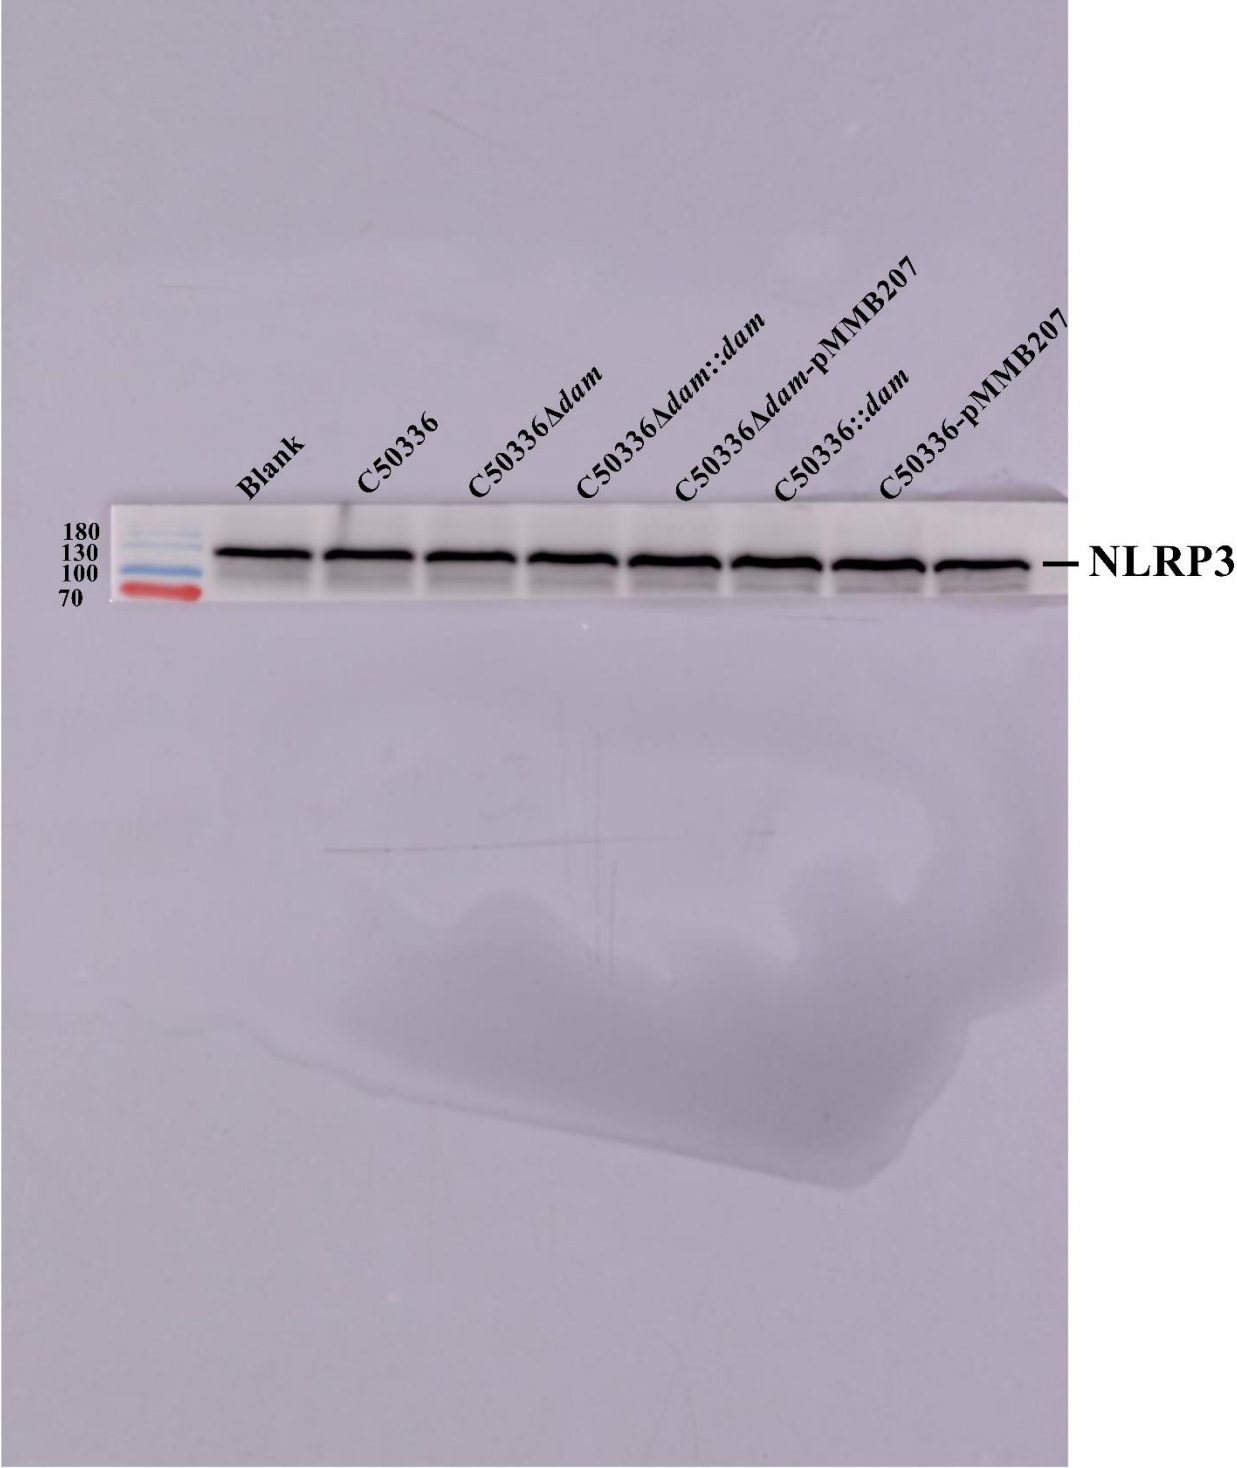

# Figure S6

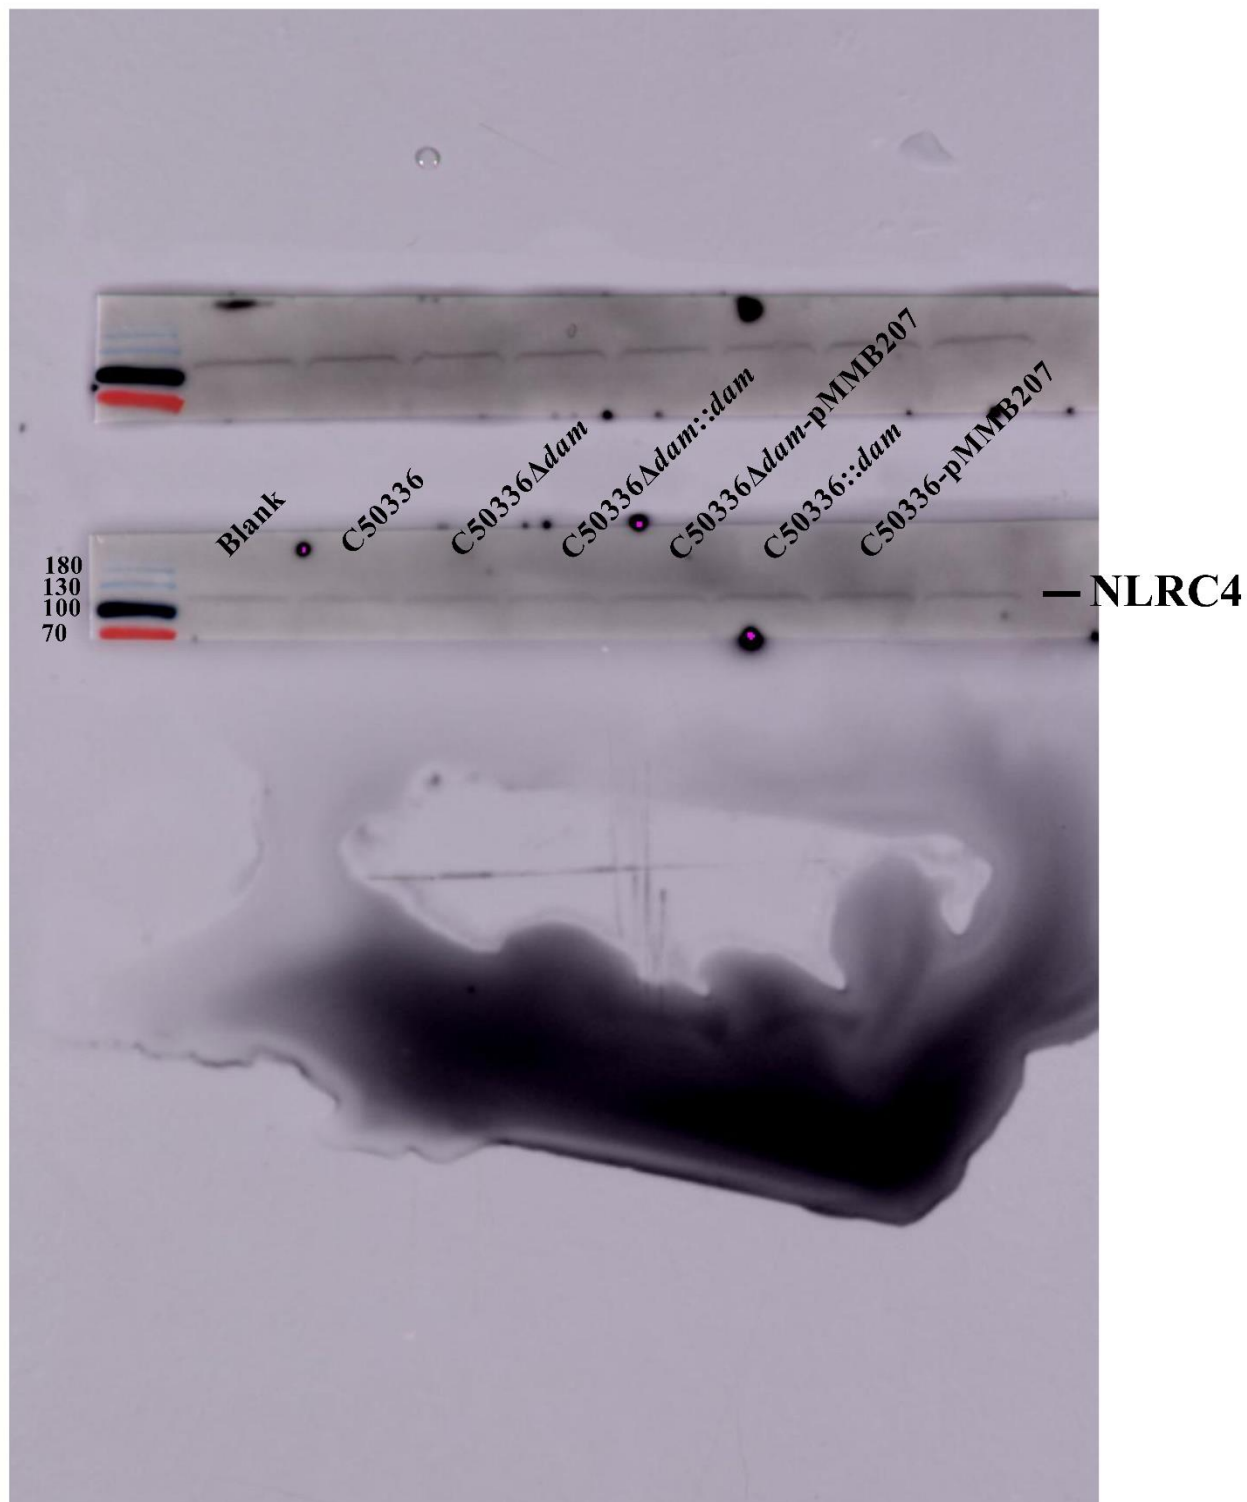

**Figure S6**

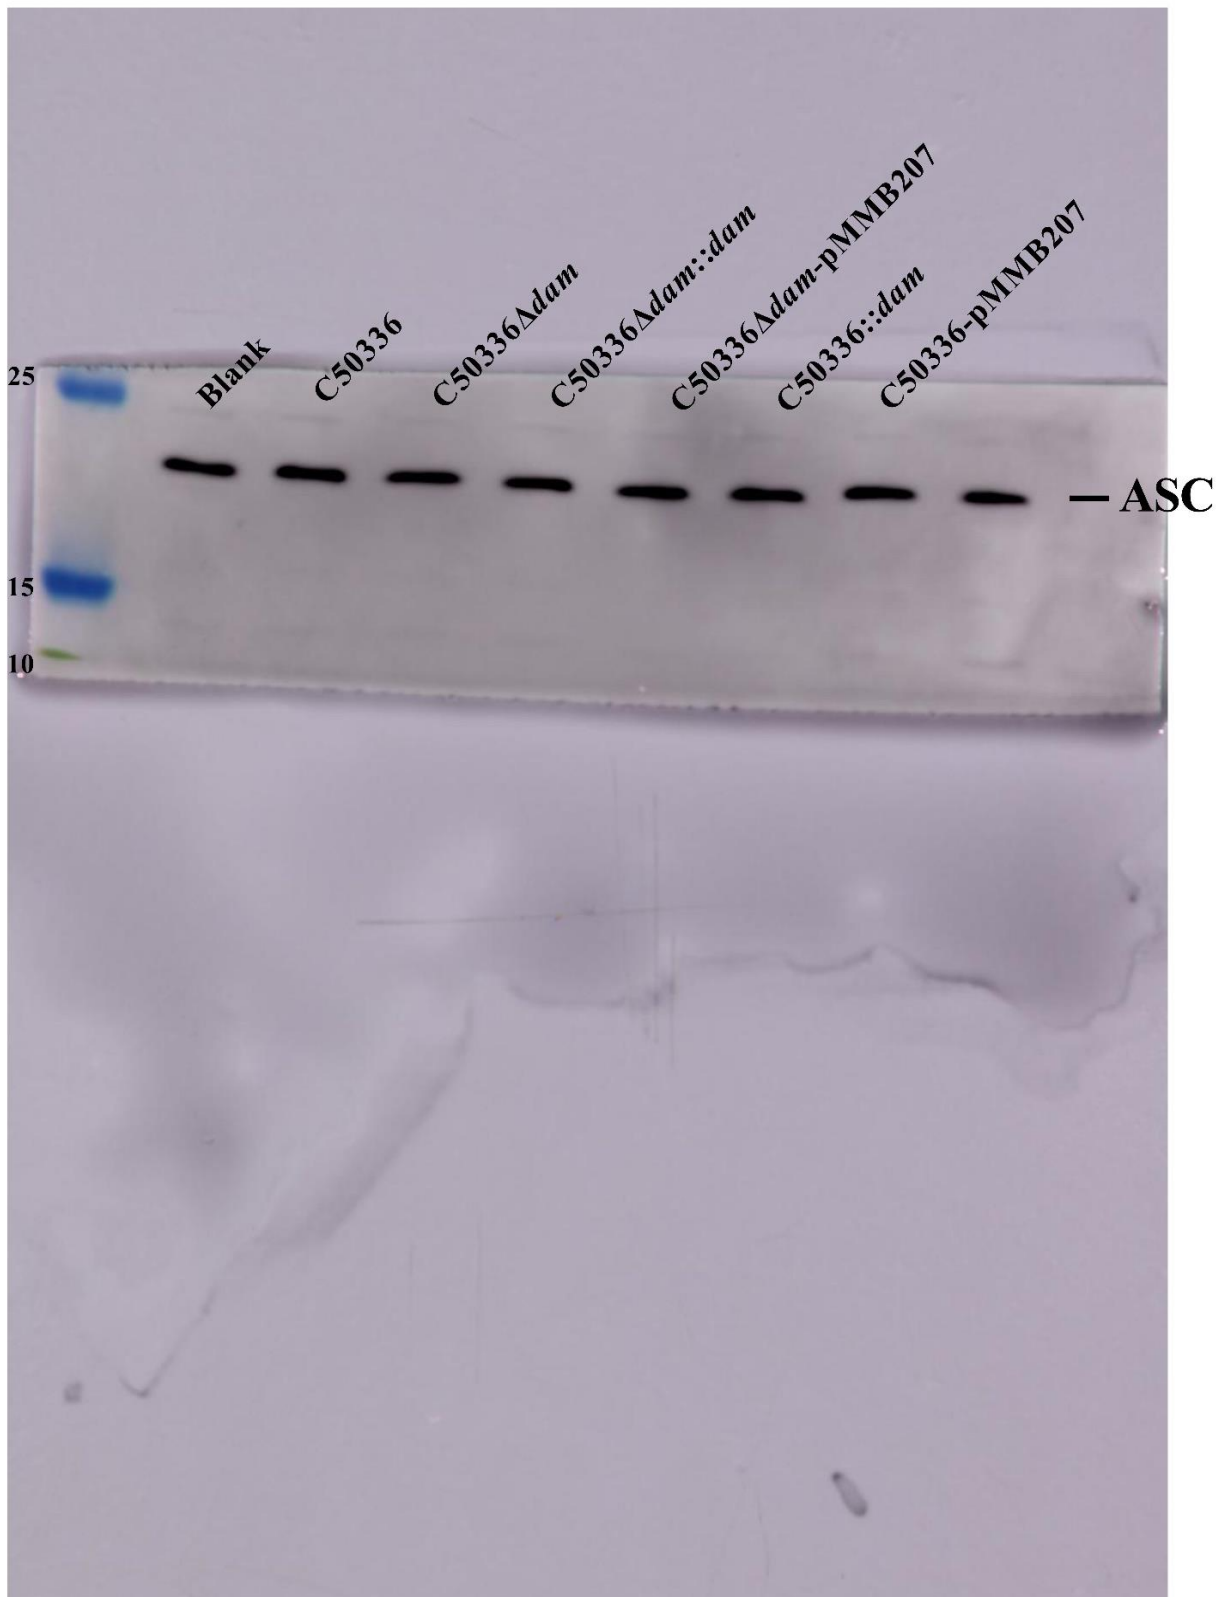

# Figure S6

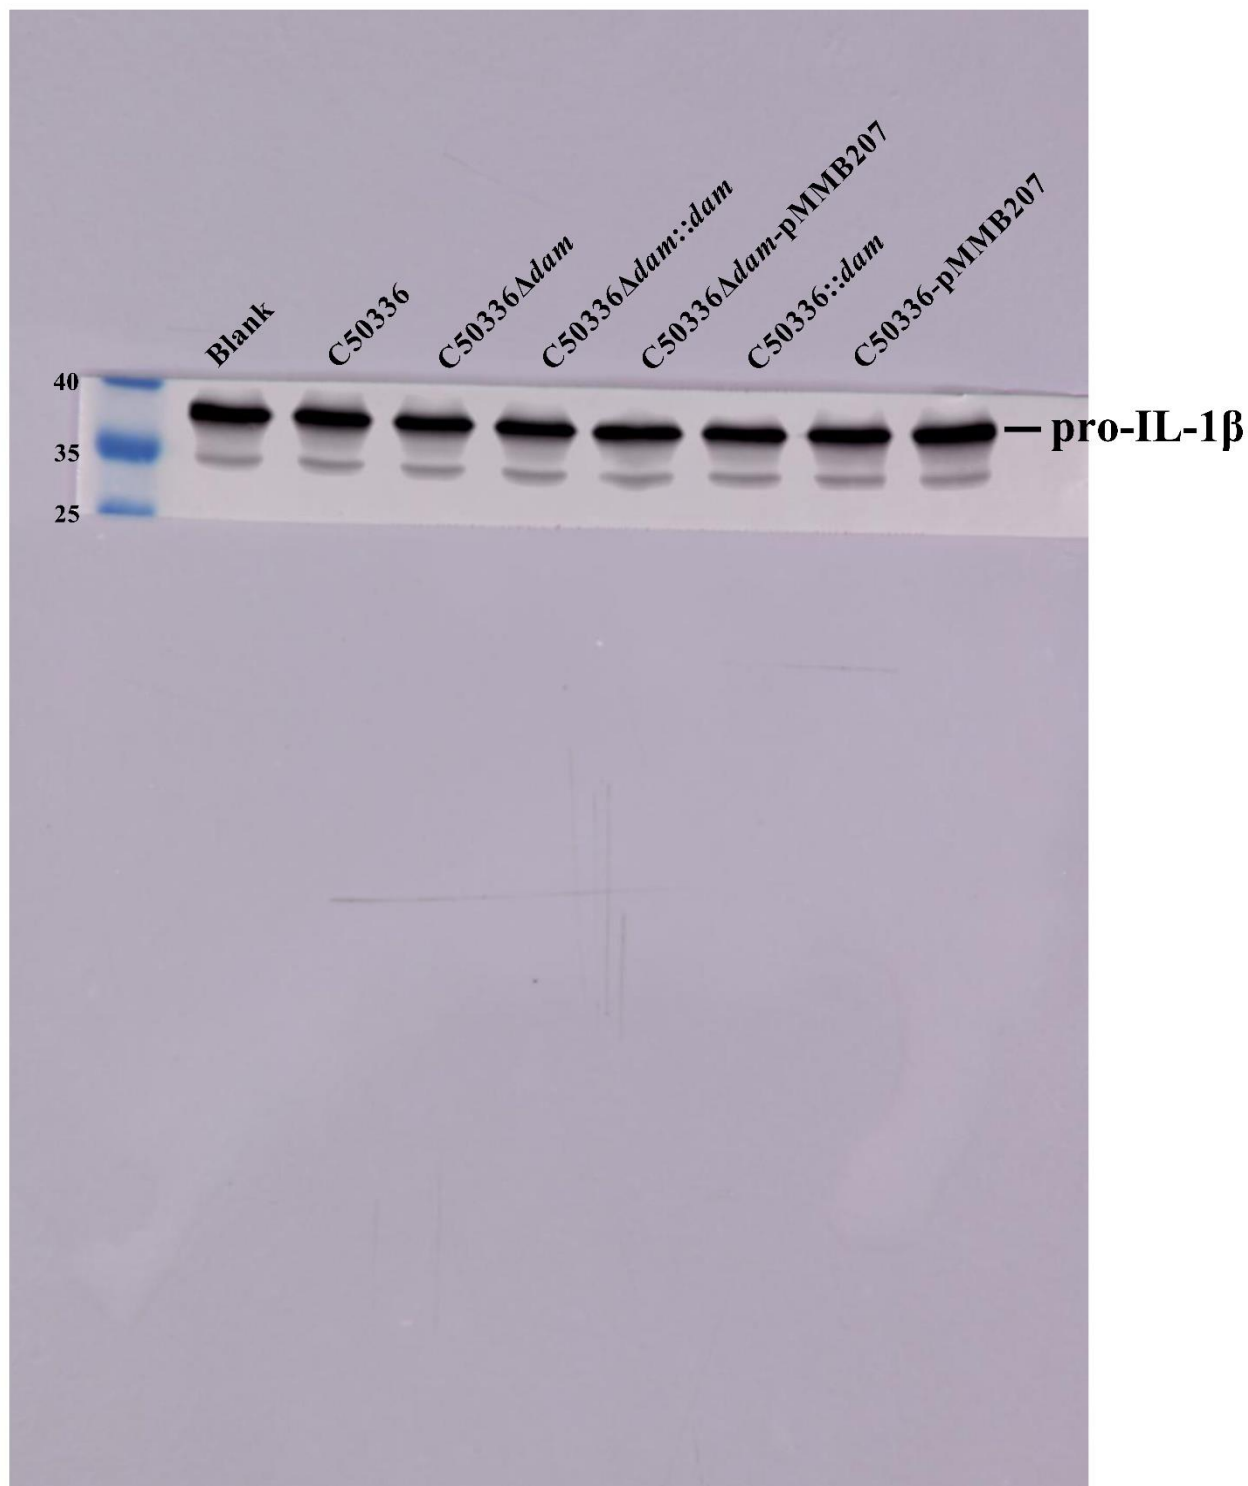

**Figure S6**

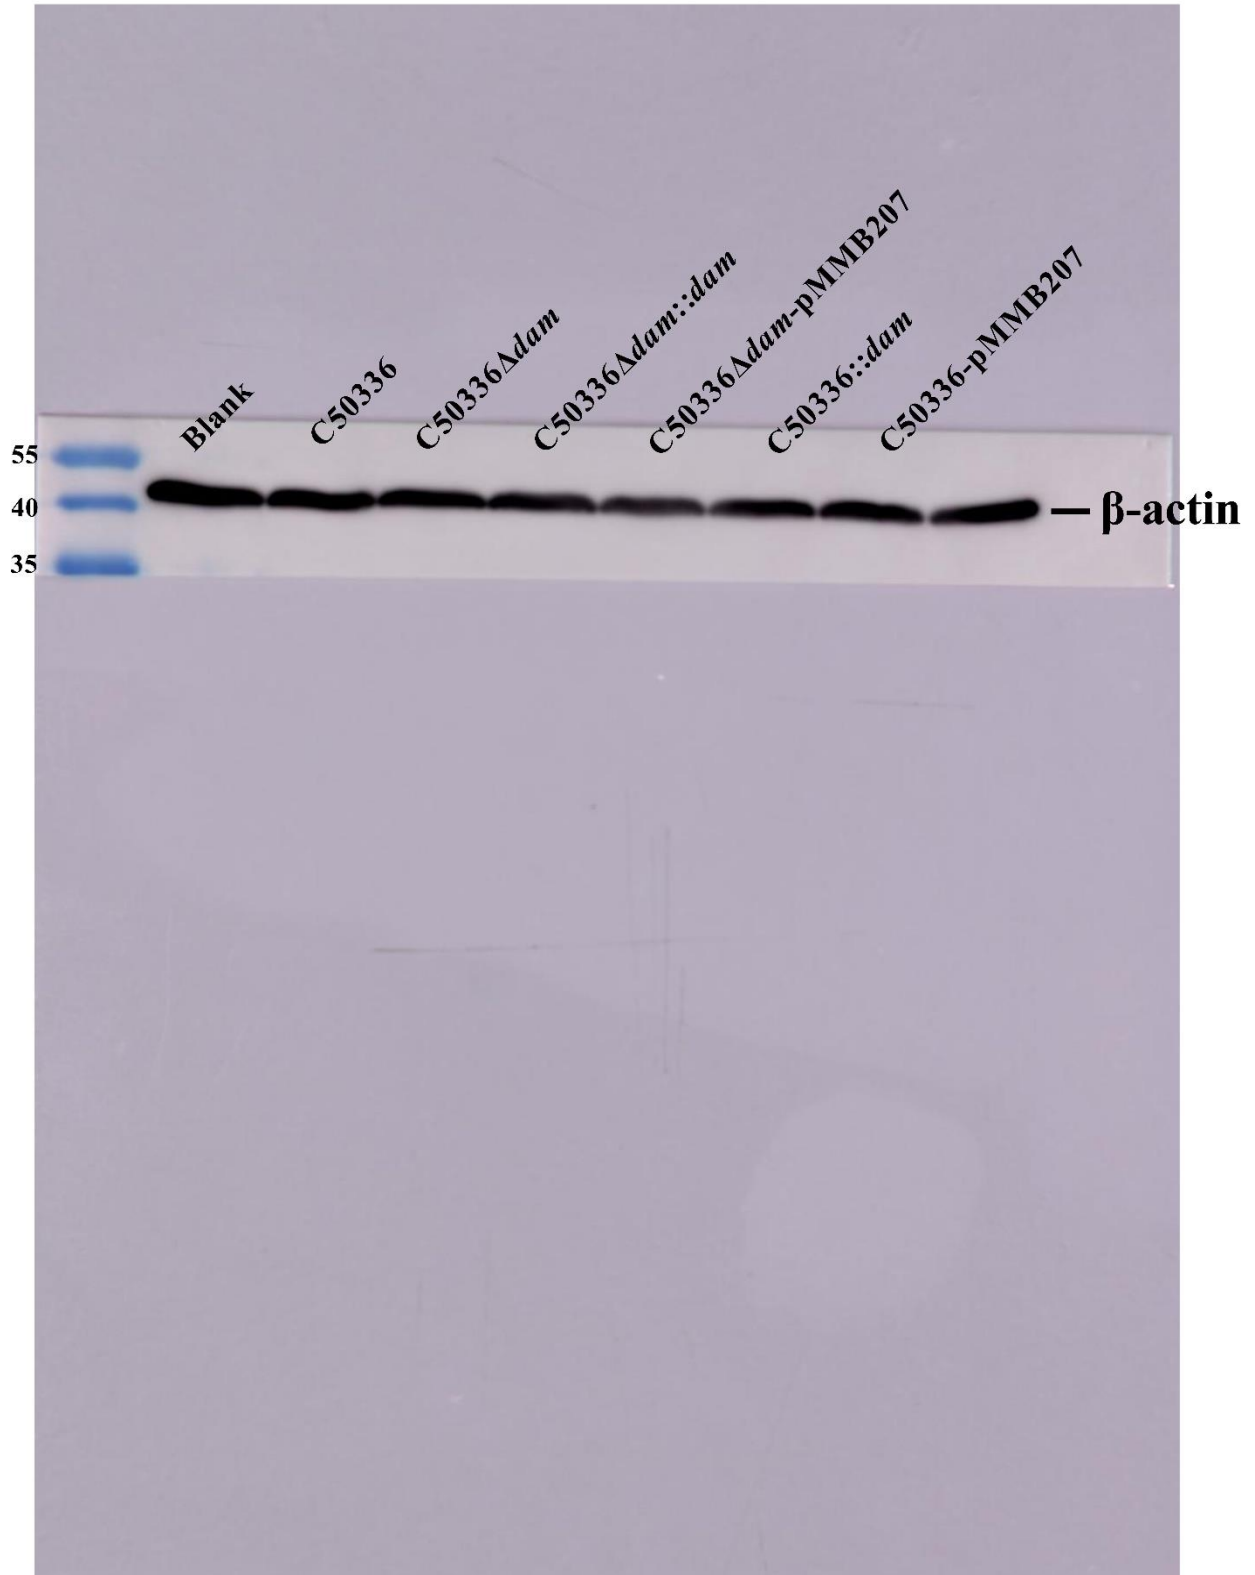



# Figure S7

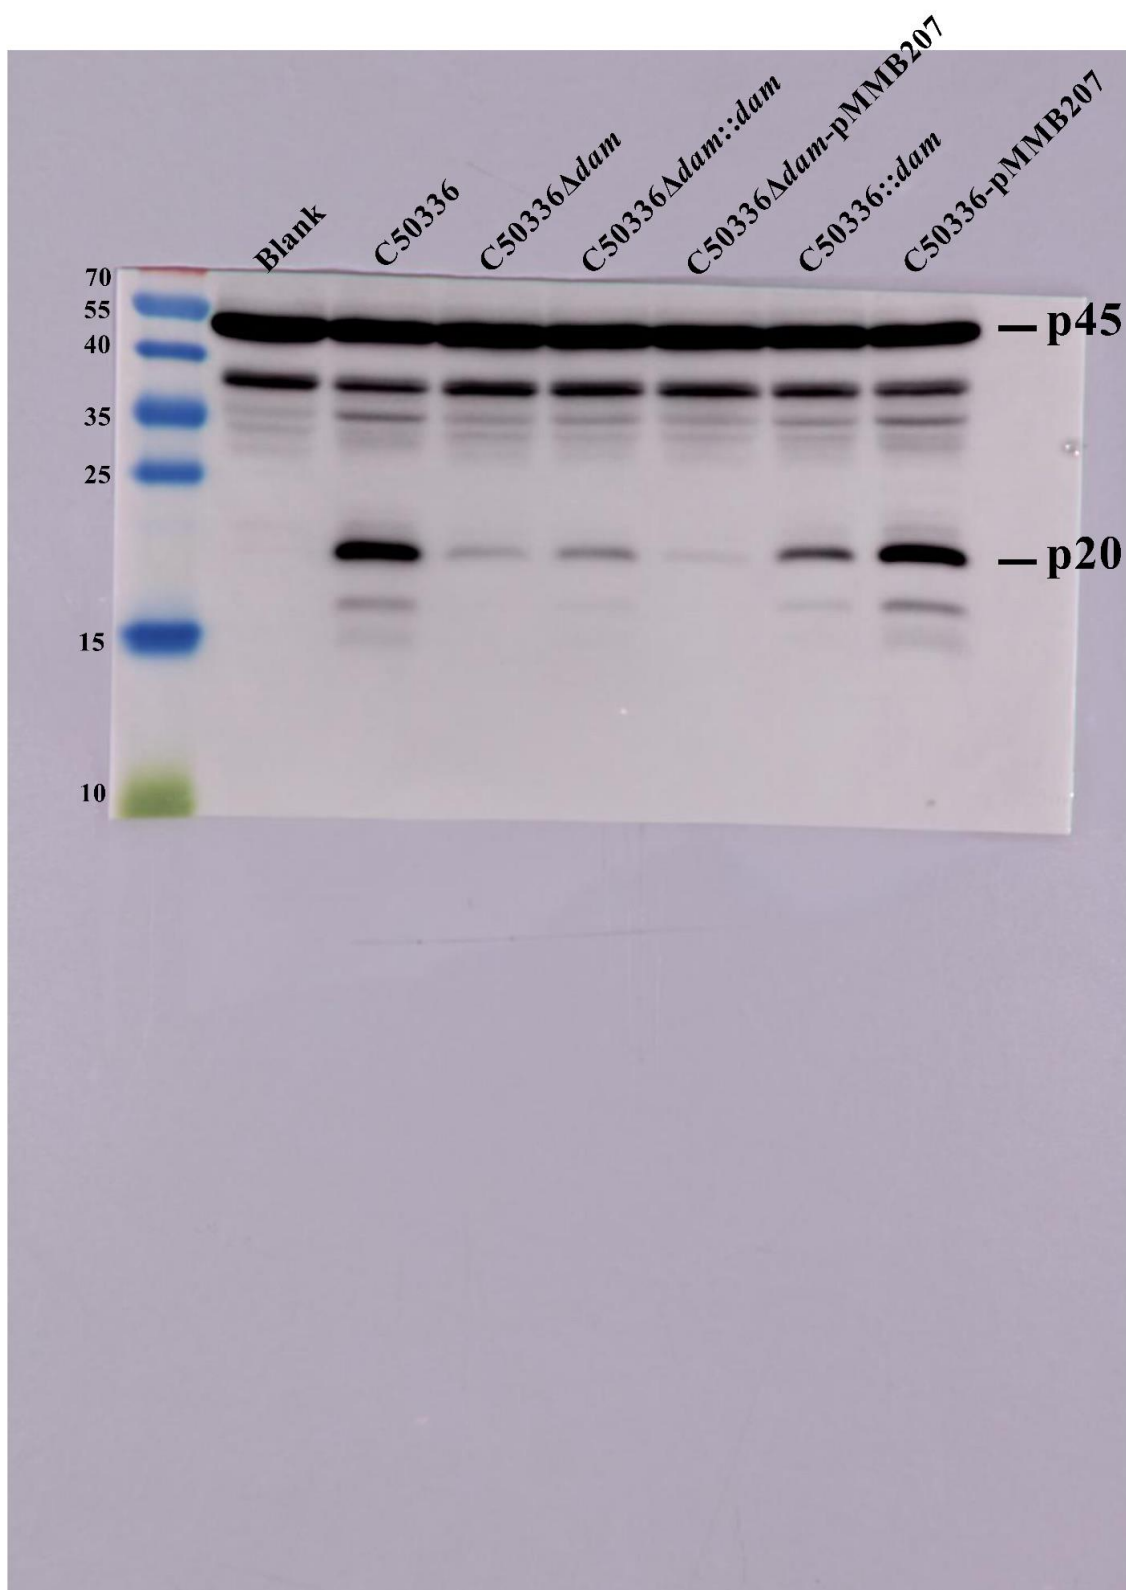

# Figure S7

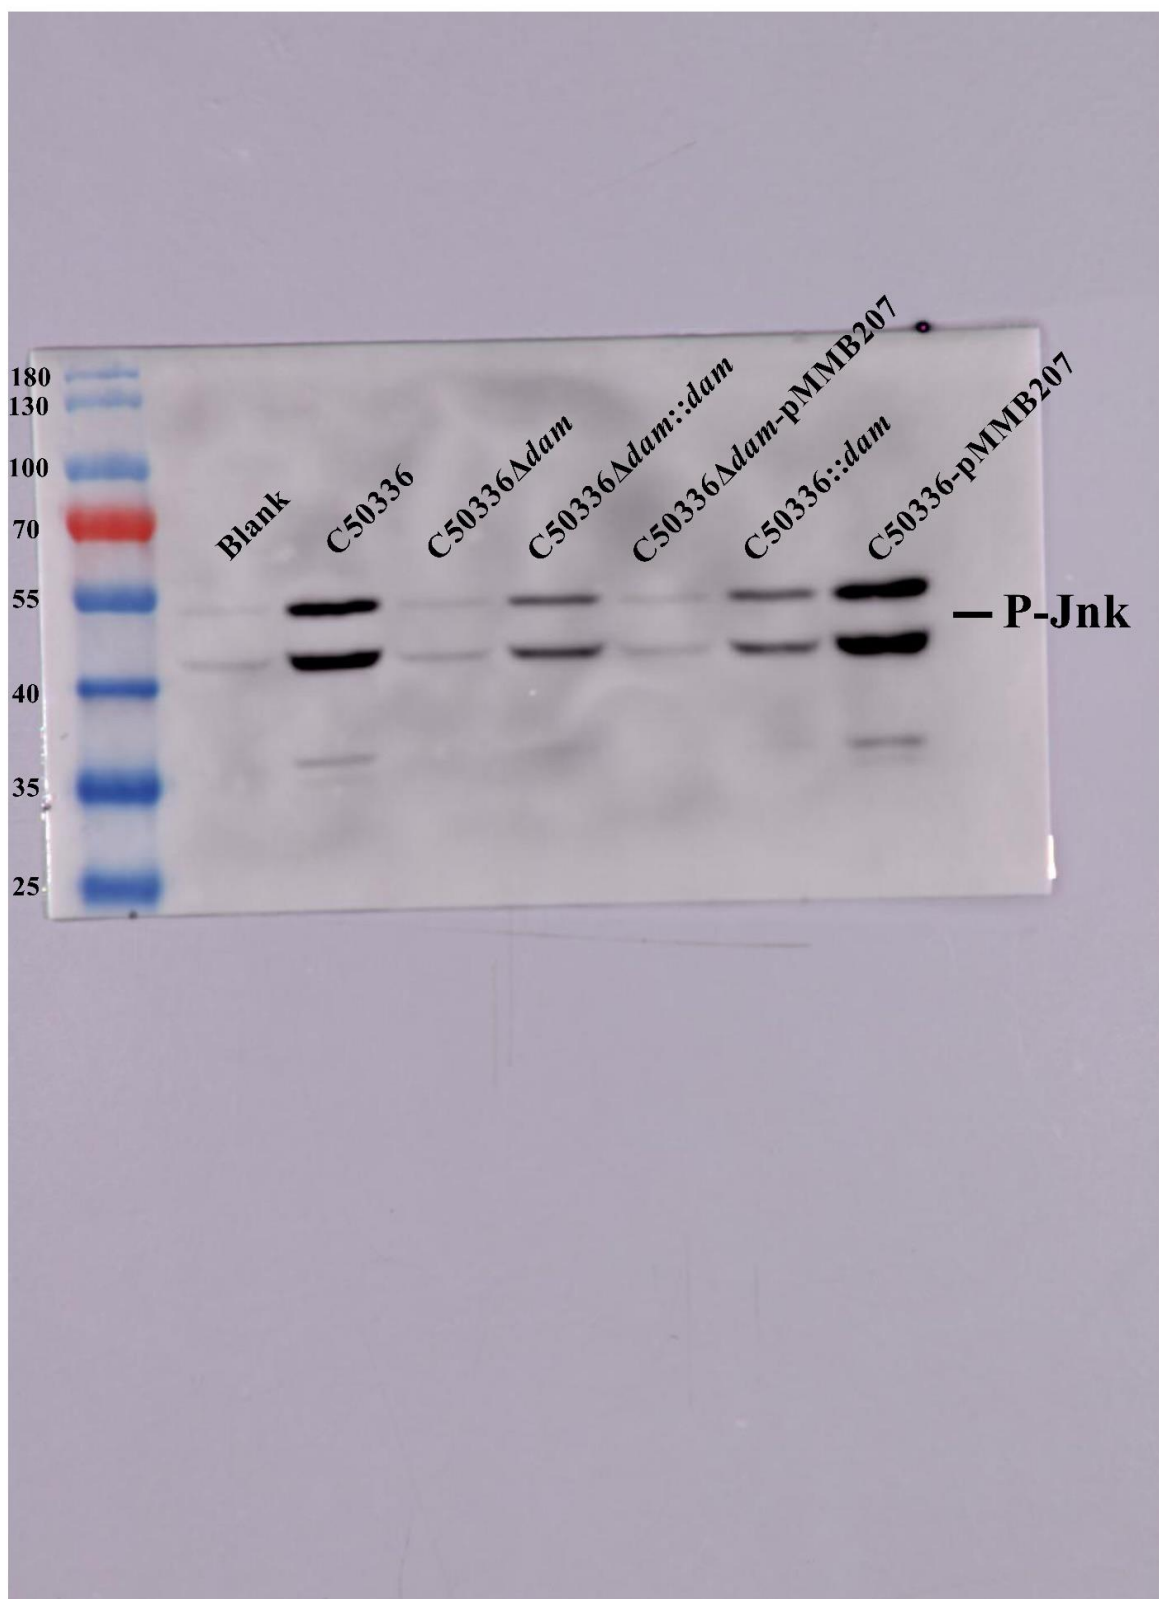

**Figure S7**

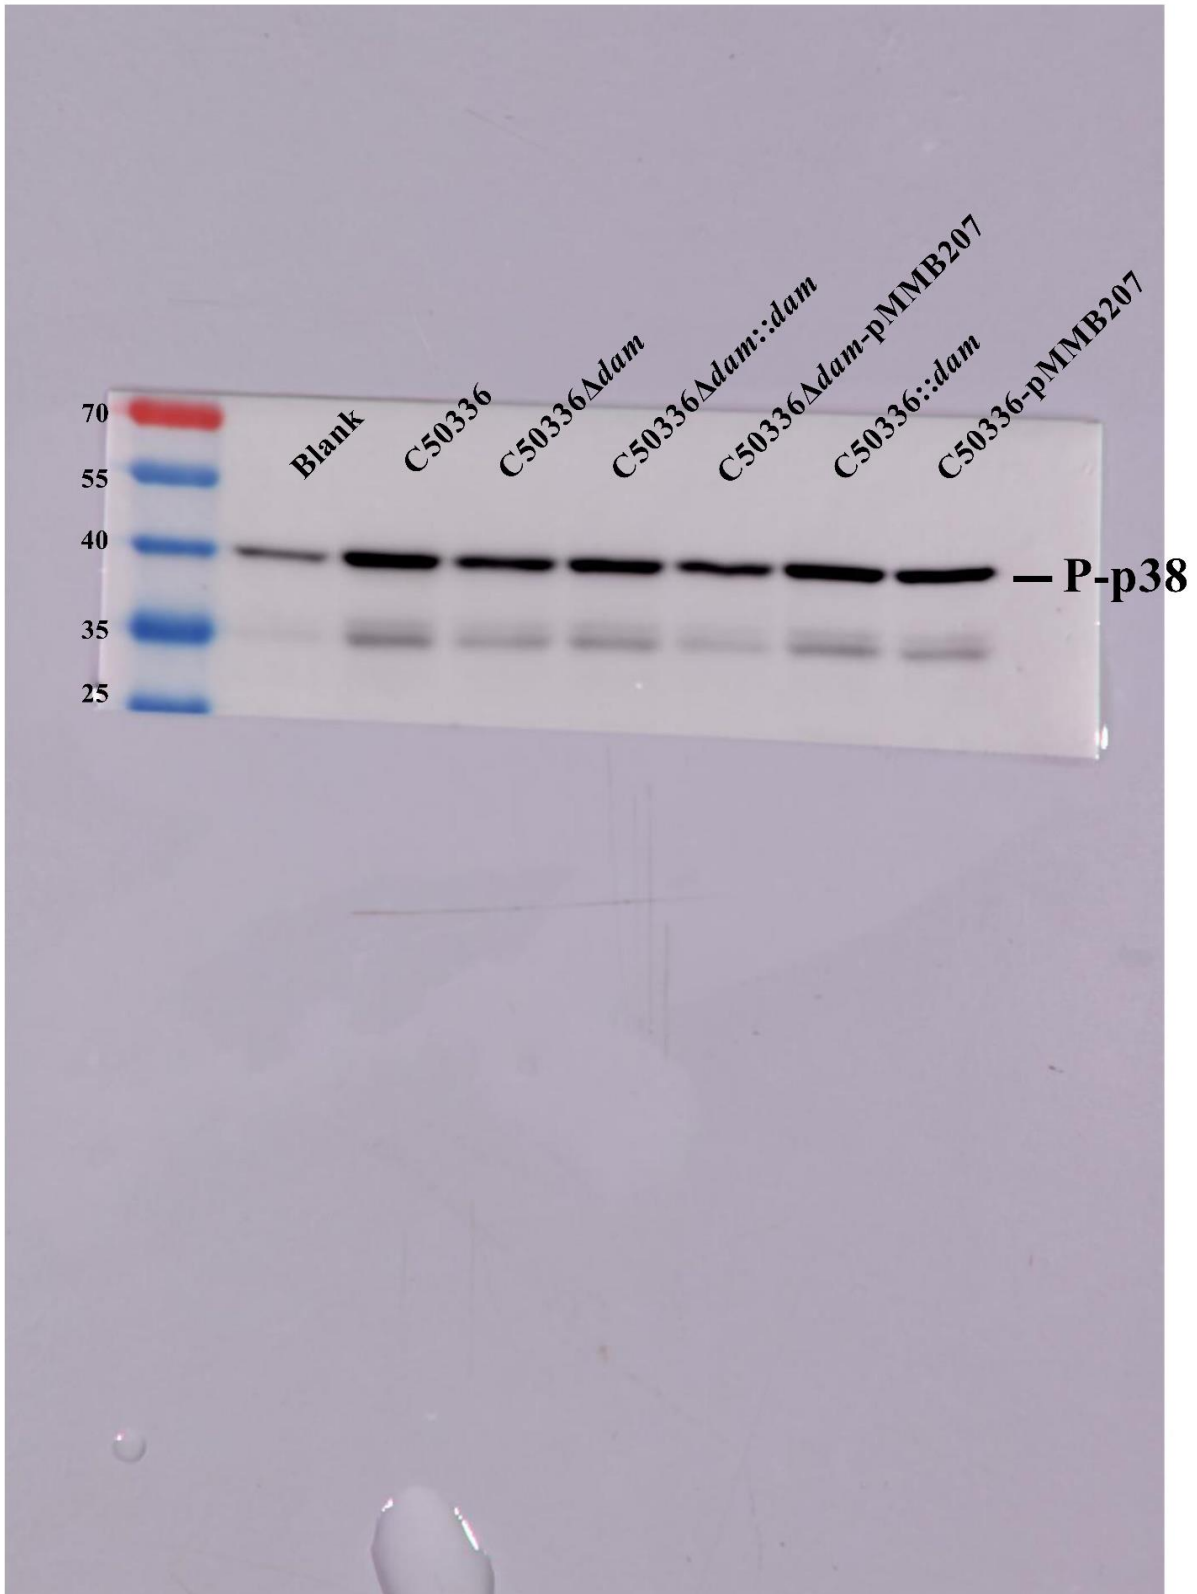

# Figure S7

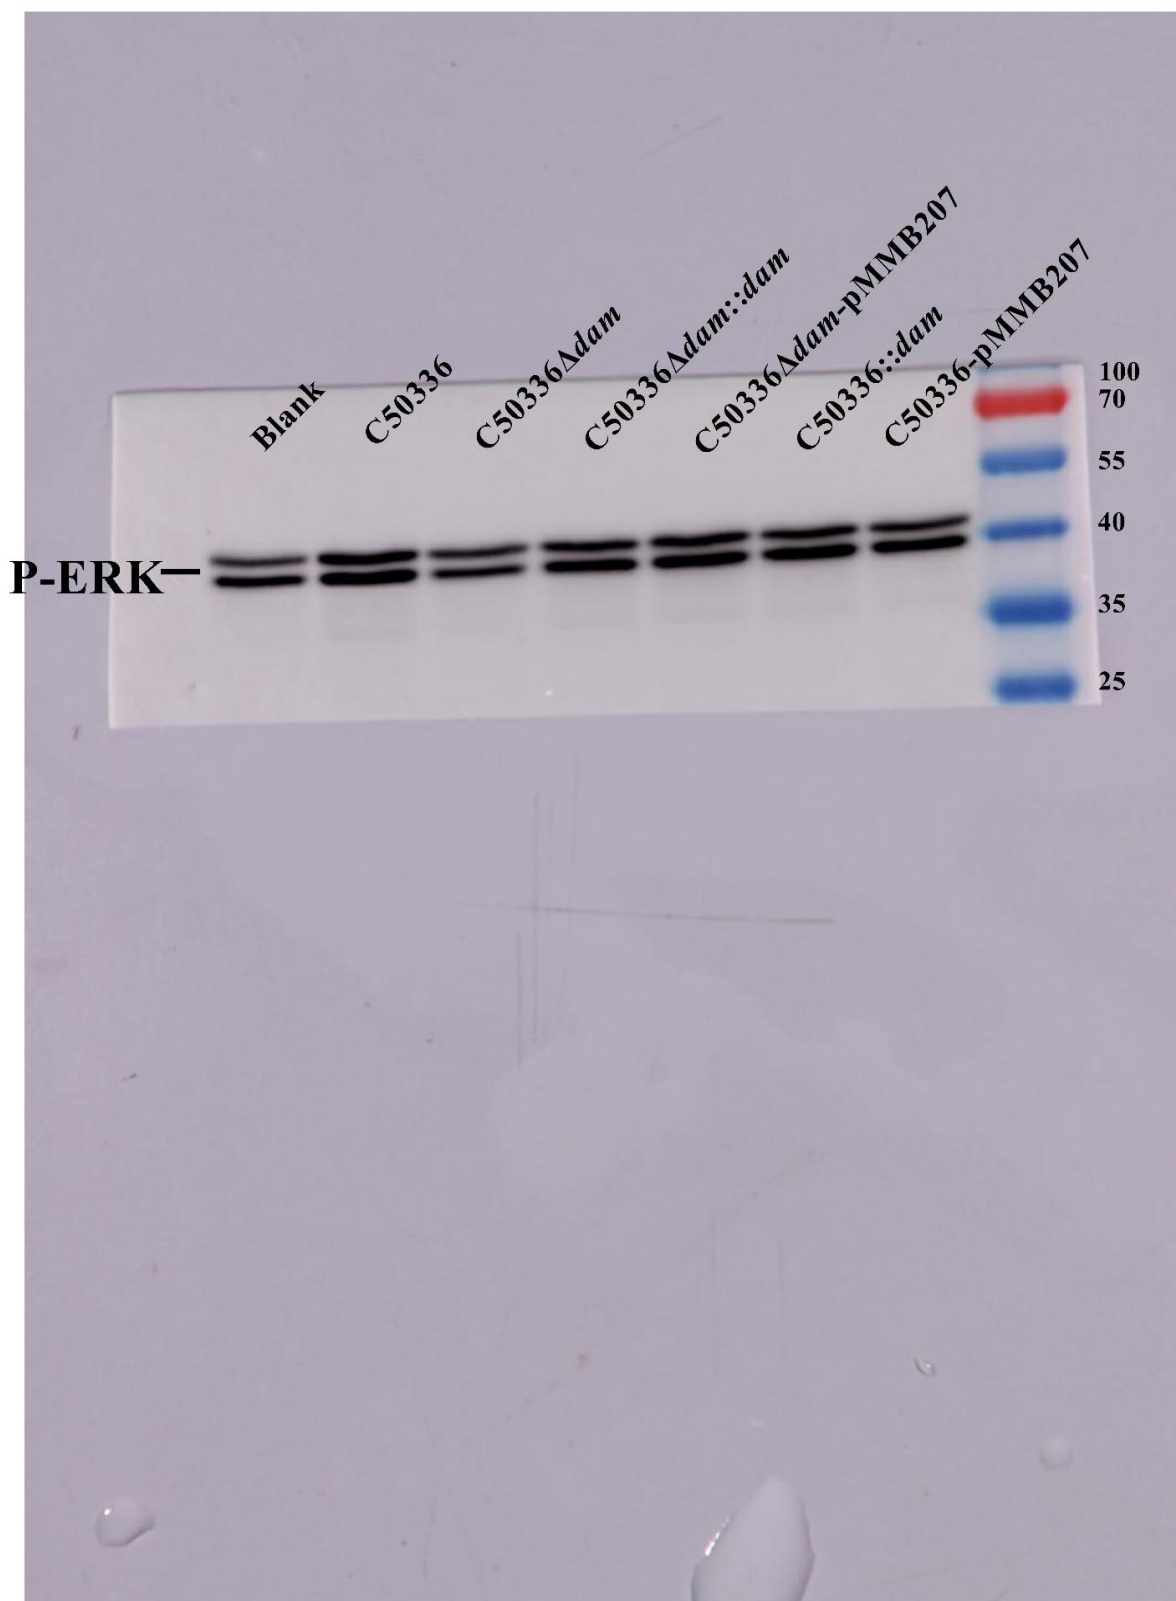

# Figure S7

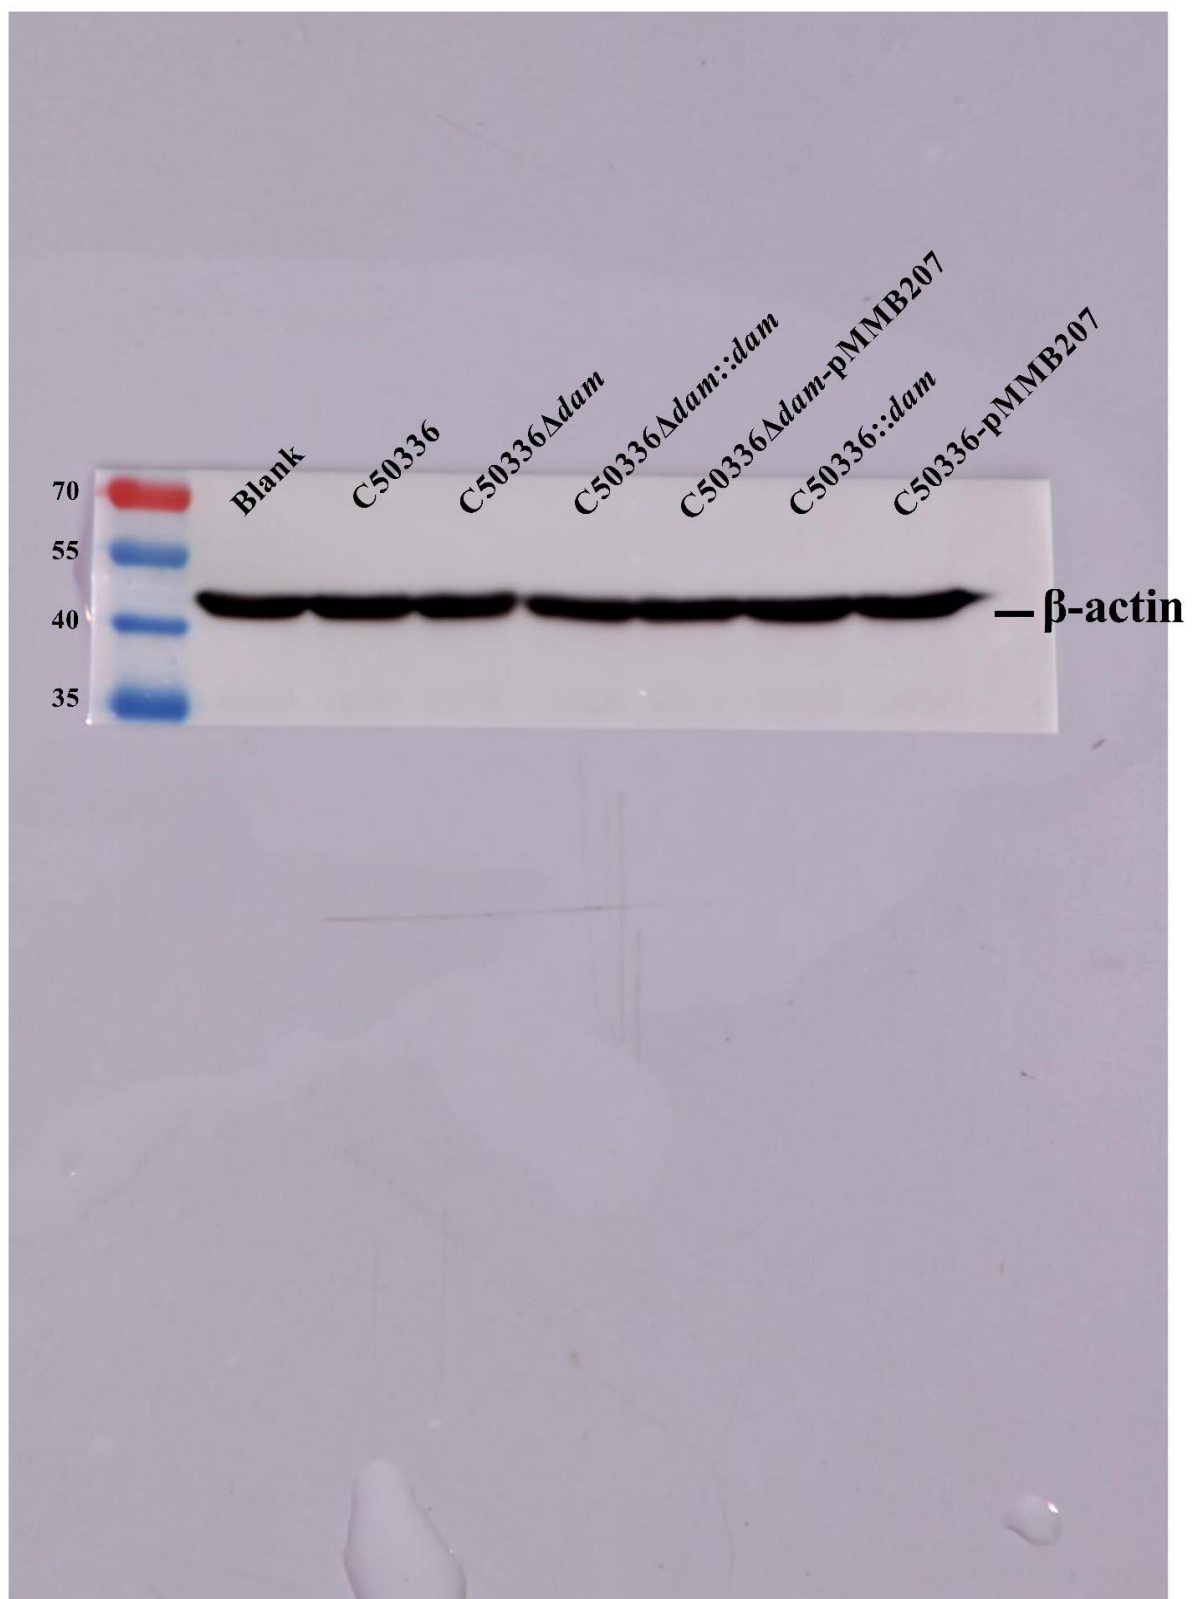

# Figure S8

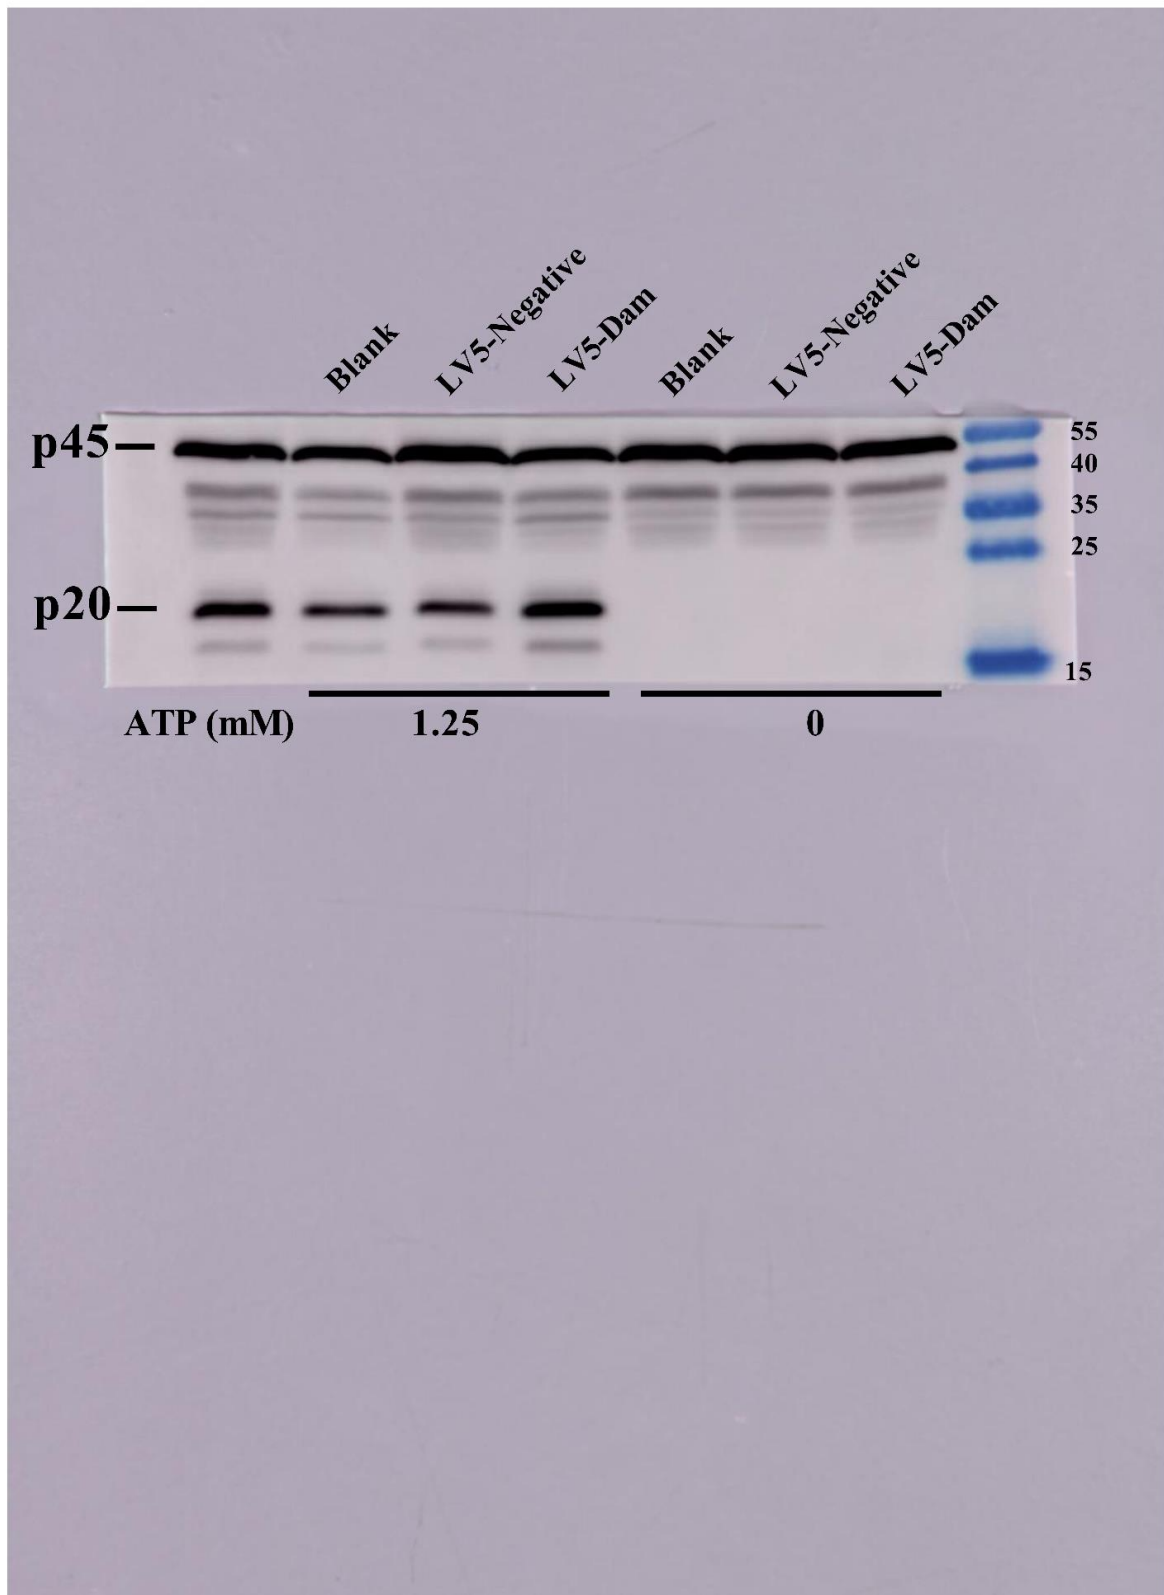

# Figure S8

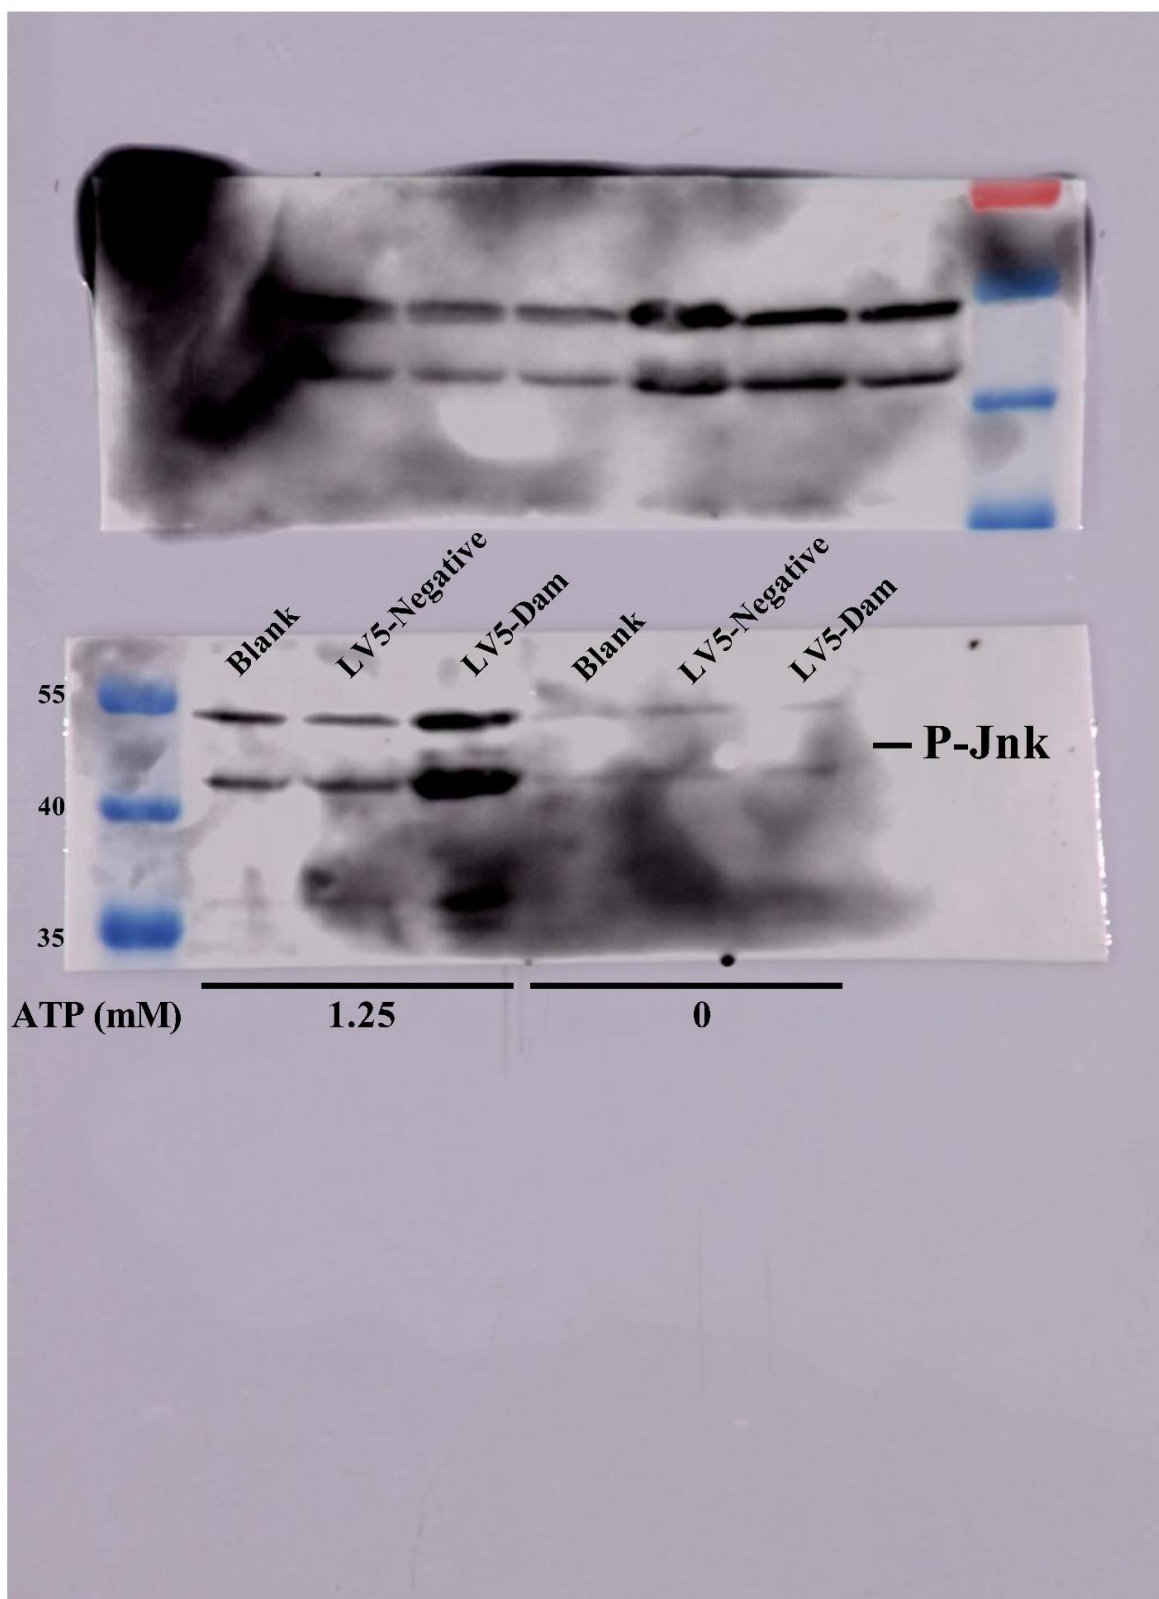

# Figure S8

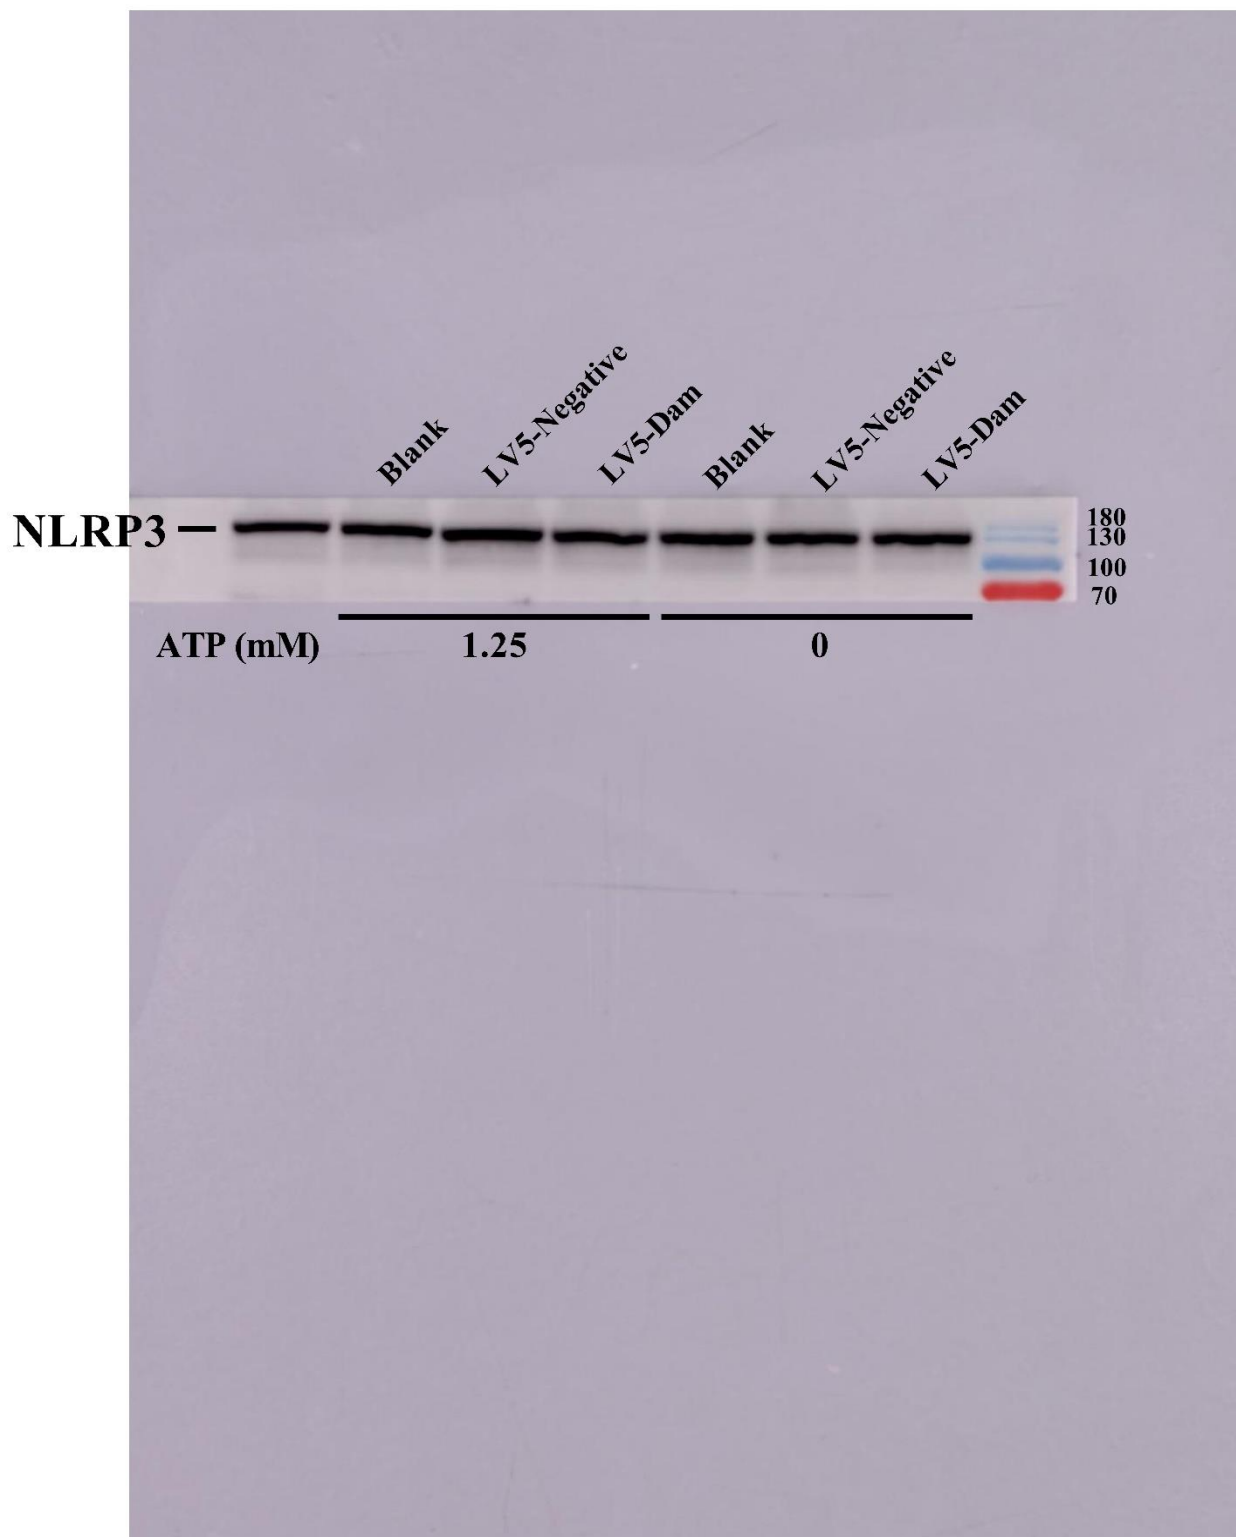



# Figure S8

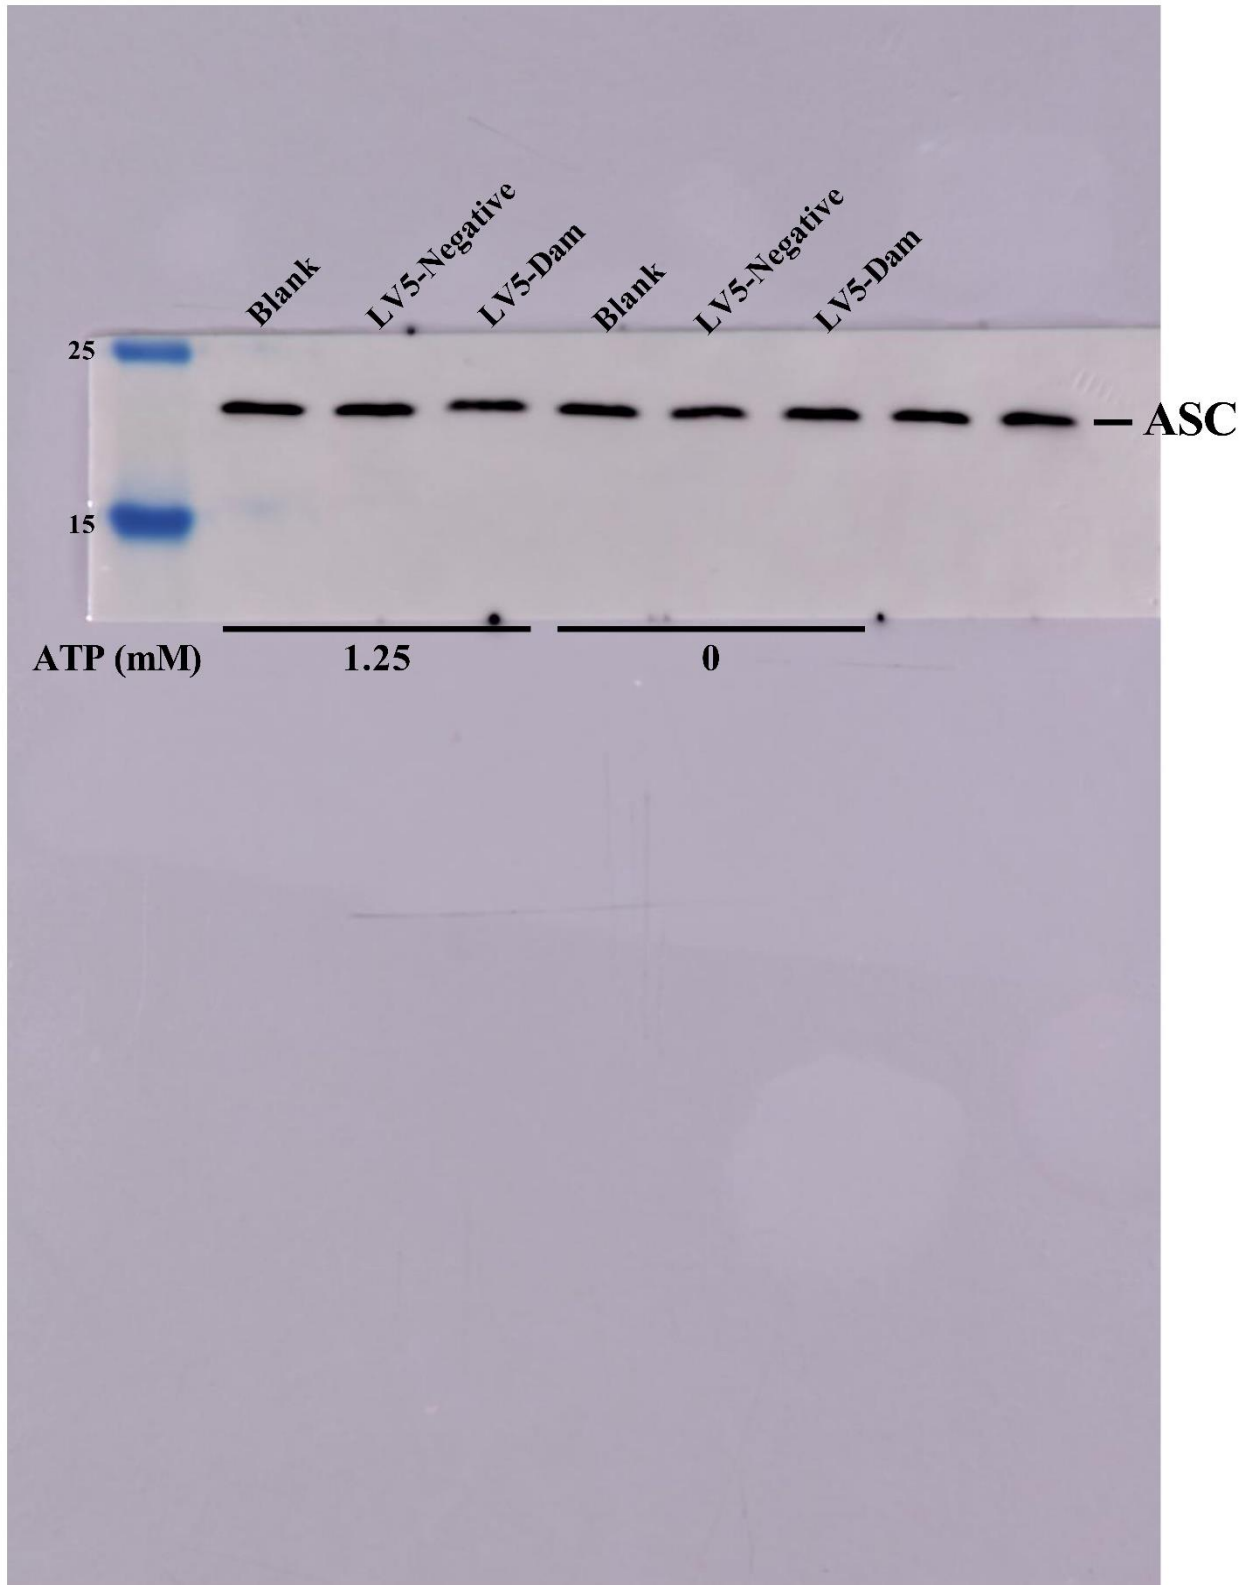

# Figure S8

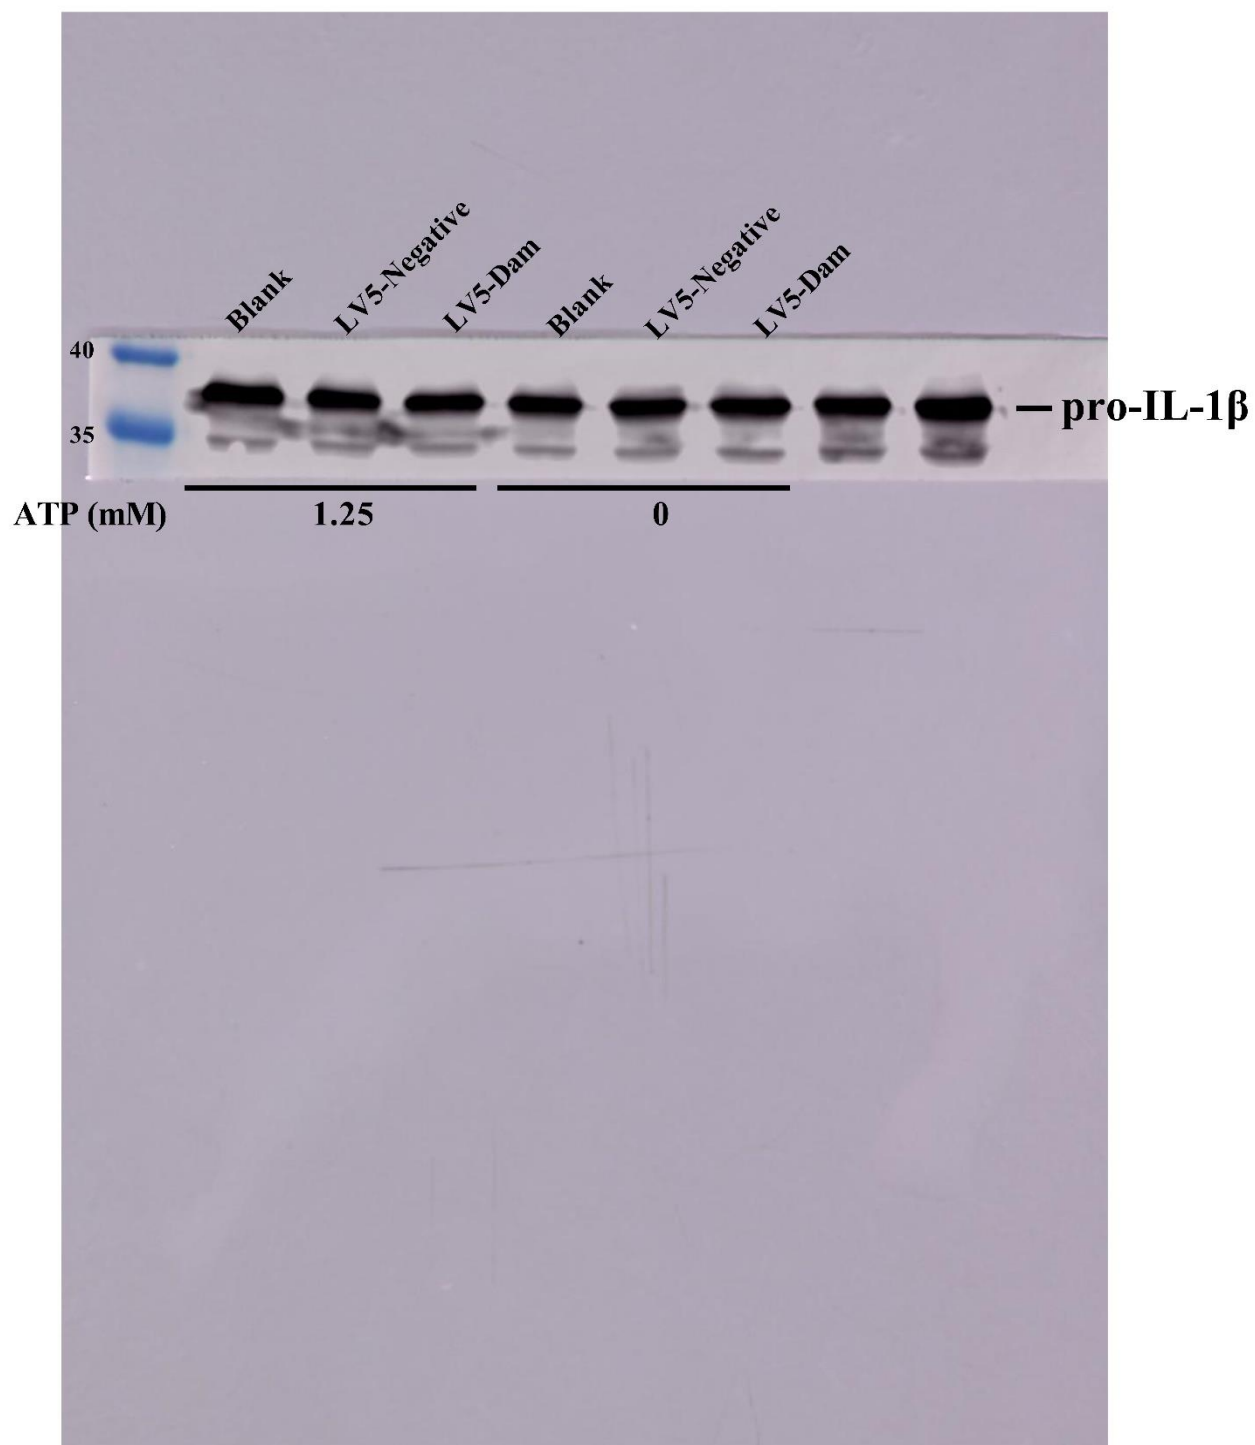

# Figure S8

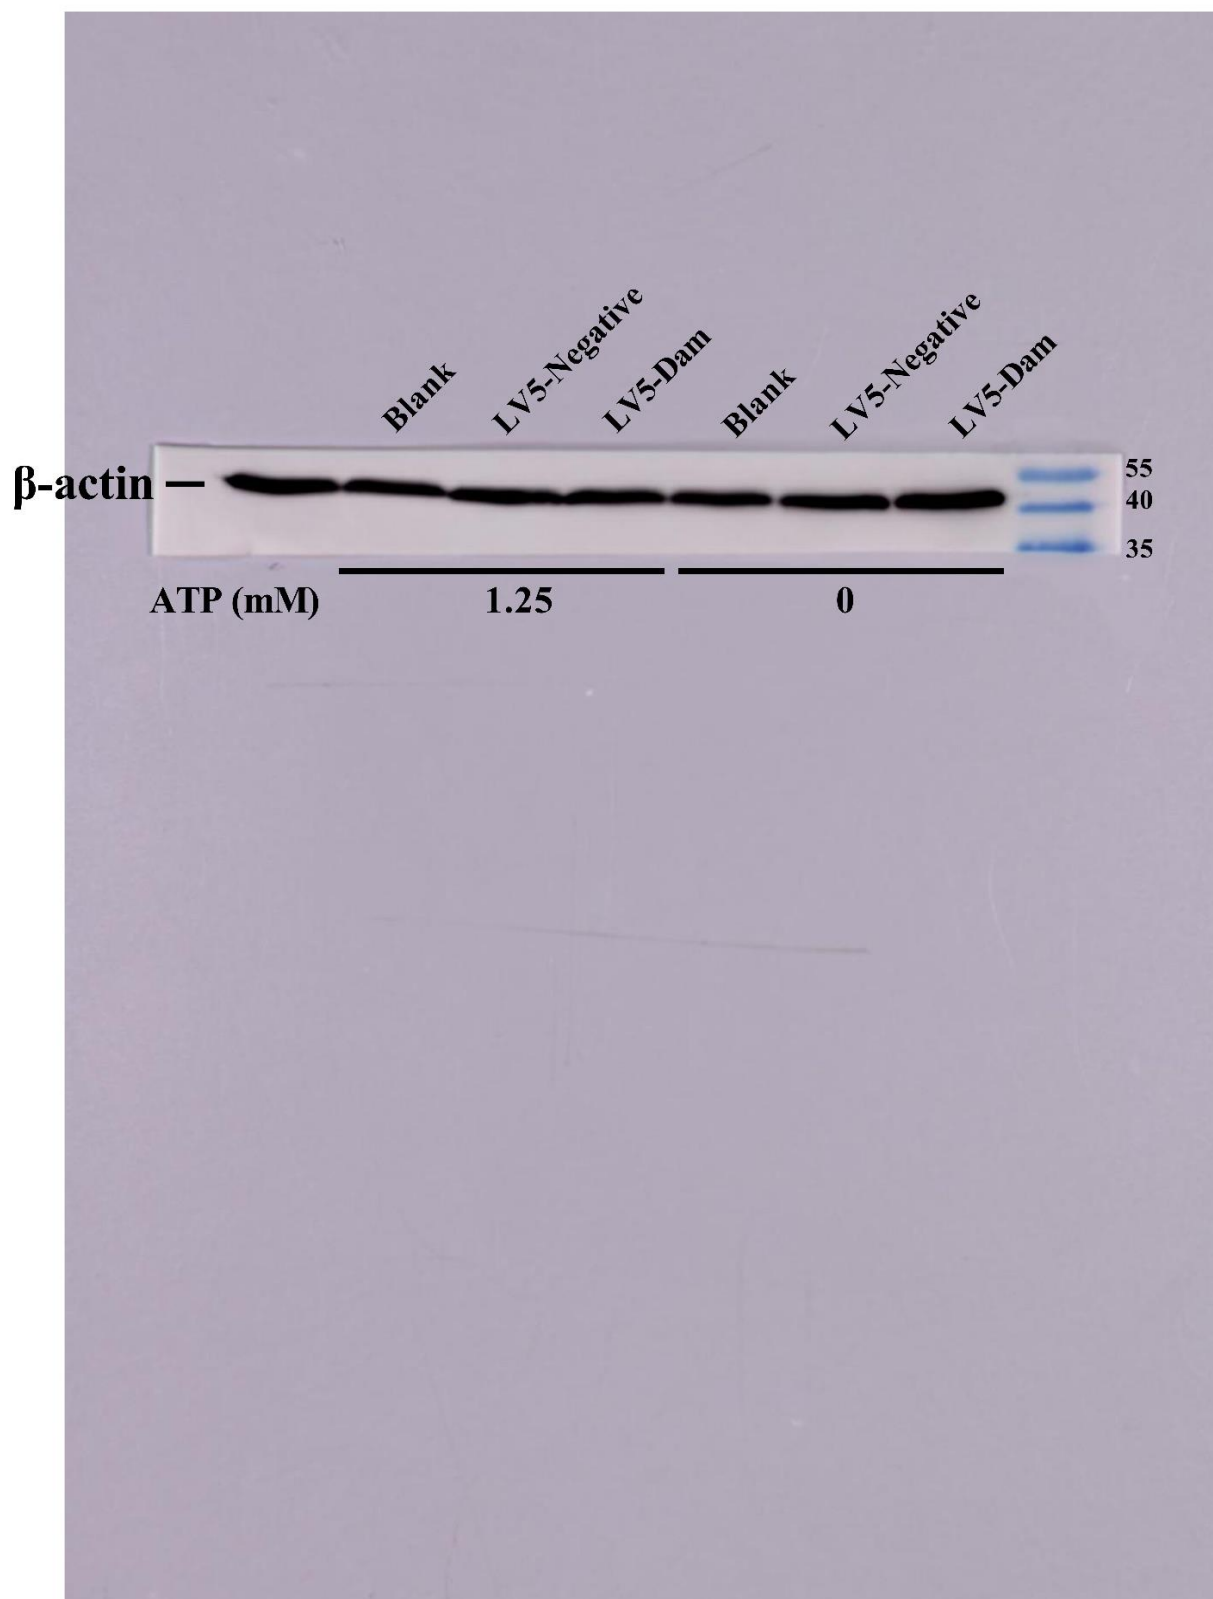

### Supplemental figure legends

**Fig. S1** Growth curves of *dam* (a), *invC* (b), *hilD* (c), *prgH* (d), and *spaN* (e) gene deletion mutants, complementation, and overexpression strains. Bacteria were grown in liquid LB medium at 37 °C for 12 h with agitation, and the OD<sub>600</sub> values of triplicate cultures in LB medium were determined in 1-h intervals.

**Fig. S2** Two rounds of screening to identify the genes involved in regulating inflammasome activation *in vitro*. J774A.1 cells were pre-treated with LPS (1 µg/mL, 5 h) and then infected with candidate transposon mutants at an MOI of 20 for 4 h, uninfected cells was used as a negative control (Blank). The activation of caspase-1 (p20) was examined via western blot. β-actin was blotted as a loading control. Molecular mass markers in kDa are indicated on the left.

**Fig. S3** Deletion mutants of *dam*, *invC*, *prgH*, and *spaN* failed to induce inflammasome activation. J774A.1 cells were pre-treated with LPS (1 µg/mL, 5 h) and then infected with WT strain C50336 and *dam*, *invC*, *hilD*, *prgH*, and *spaN* gene deletion mutants at an MOI of 20 for 4 h, uninfected cells was used as a negative control (Blank). The activation of caspase-1 (p20) was examined via western blot. β-actin was blotted as a loading control. Molecular mass markers in kDa are indicated on the left.

**Fig. S4** Deletion of *prgH* did not influence the synthesis of inflammasome components. C57BL/6 BMDMs were pre-treated with LPS (1 µg/mL) for 5 h (untreated and uninfected BMDMs was used as a negative control, Blank LPS-), and then infected with C50336, C50336Δ*prgH*, C50336Δ*prgH*::*prgH*, C50336Δ*prgH*-pMMB207, C50336::*prgH*, or C50336-pMMB207 at an MOI of 20 for 4 h, uninfected BMDMs

was used as another negative control (Blank LPS+). Bacteria bearing pMMB207 plasmids were cultured with IPTG (0.5 mM). The expression of caspase-1, NLRP3, NLRC4, ASC, and pro-IL-1 $\beta$  were analyzed by immunoblotting.  $\beta$ -actin was blotted as a loading control. Molecular mass markers in kDa are indicated on the left.

**Fig. S5** Overexpression of Dam inhibited inflammasome activation. C57BL/6 BMDMs were pre-treated with LPS (1  $\mu$ g/mL) for 5 h (untreated and uninfected BMDMs was used as a negative control, Blank LPS-), and then infected with C50336, C50336 $\Delta$ dam, C50336 $\Delta$ dam::*dam*, C50336 $\Delta$ dam-pMMB207, C50336::*dam*, or C50336-pMMB207 at an MOI of 20 for 4 h, uninfected BMDMs was used as another negative control (Blank LPS+). Bacteria bearing pMMB207 plasmids were cultured with IPTG (0.5 mM). The expression of caspase-1, NLRP3, NLRC4, ASC, and pro-IL-1 $\beta$  were analyzed by immunoblotting.  $\beta$ -actin was blotted as a loading control. Molecular mass markers in kDa are indicated on the left.

**Fig. S6** The ability of the *dam* complementation strain and overexpression strain cultured without IPTG to activate the inflammasome was improved. C57BL/6 BMDMs were pre-treated with LPS (1  $\mu$ g/mL) for 5 h (untreated and uninfected BMDMs was used as a negative control, Blank LPS-), and then infected with C50336, C50336 $\Delta$ dam, C50336 $\Delta$ dam::*dam*, C50336 $\Delta$ dam-pMMB207, C50336::*dam*, or C50336-pMMB207 at an MOI of 20 for 4 h uninfected BMDMs was used as another negative control (Blank LPS+). Bacteria bearing pMMB207 plasmids were cultured without IPTG. The expression of caspase-1, NLRP3, NLRC4, ASC, and pro-IL-1 $\beta$  were analyzed by immunoblotting.  $\beta$ -actin was blotted as a loading control. Molecular mass markers in kDa are indicated on the left.

**Fig. S7** The deletion of Dam blocked the Jnk pathway in infected J774A.1 cells. J774A.1 cells were pre-treated with LPS (1  $\mu\text{g}/\text{mL}$ , 5 h) and then infected with C50336, C50336 $\Delta dam$ , C50336 $\Delta dam::dam$ , C50336 $\Delta dam$ -pMMB207, C50336::dam, or C50336-pMMB207 at an MOI of 20 for 4 h, uninfected cells was used as a negative control (Blank). Bacteria bearing pMMB207 plasmids were cultured without IPTG. The activation of caspase-1, phosphorylated Jnk (P-Jnk), phosphorylated p38 (P-p38), and phosphorylated ERK1/2 (P-ERK1/2) were analyzed by immunoblotting.  $\beta$ -actin was blotted as a loading control. Molecular mass markers in kDa are indicated on the left.

**Fig. S8** Dam independently promoted NLRP3 inflammasome activation. J774A.1 cells were transduced with LV5-Dam or LV5-negative lentivirus, untreated cells was used as a negative control (Blank). Cells were then pre-treated with LPS (1  $\mu\text{g}/\text{mL}$ , 5 h) and stimulated with or without ATP (1.25 mM) for 1 h. The expression of caspase-1, NLRP3, ASC, pro-IL-1 $\beta$ , and P-Jnk were analyzed by immunoblotting.  $\beta$ -actin was blotted as a loading control. Molecular mass markers in kDa are indicated on the left.
